# Supplementary material for: Acid catalyzed one-pot approach towards the synthesis of curcuminoid systems: unsymmetrical diarylidene cycloalkanones, exploration of their single crystals, optical and nonlinear optical properties
Source: Royal Society of Chemistry journal article supplement (doi:10.1039/d2ra07681k), 2023-01-01
Supplement: d2ra07681k1.pdf [file d2ra07681k1.pdf]

**Acid catalyzed one-pot approach towards the synthesis of curcuminoids systems: unsymmetrical diarylidene cycloalkanones, exploration of their single crystals, optical and nonlinear optical properties**

Akbar Ali,<sup>1</sup> Zia Ud Din,<sup>2</sup> Muhammad Ibrahim,\*<sup>3</sup> Muhammad Ashfaq,\*<sup>4</sup> Shabbir Muhammad,<sup>5</sup> Dania Gull,<sup>1</sup> Muhammad Nawaz Tahir,<sup>4</sup> Edson Rodrigues-Filho,<sup>2</sup> Abdullah G. Al-Sehemi,<sup>5</sup> Muhammad Suleman<sup>6</sup>

<sup>1</sup>Department of Chemistry, Government College University Faisalabad, 38000-Faisalabad, Pakistan.

<sup>2</sup>LaBioMMi, Departamento de Química, Universidade Federal de São Carlos, CP 676, São Carlos, SP 13.565-905, Brazil

<sup>3</sup>Department of Applied Chemistry, Government College University Faisalabad, Pakistan.

<sup>4</sup>Department of Physics, University of Sargodha, Sargodha, Pakistan

<sup>5</sup>Department of Chemistry, College of Science, King Khalid University, P.O. Box 9004, Abha 61413, Saudi Arabia

<sup>6</sup>Department of Chemistry, Riphah International University Faisalabad Campus, Pakistan

\* Corresponding authors E-mail addresses:

(Dr. Muhammad Ibrahim) [ibrahimchem@gmail.com](mailto:ibrahimchem@gmail.com)

(Muhammad Ashfaq) [ashfaq.muhammad@uos.edu.pk](mailto:ashfaq.muhammad@uos.edu.pk); [muhammadashfaq1400@gmail.com](mailto:muhammadashfaq1400@gmail.com)

**Table: S1** Selected bond lengths and bond angles in **BNTP-BDBC**.

| Selected bond lengths in <b>BNTP</b> |             | Selected bond lengths in <b>BDBC</b> |             |
|--------------------------------------|-------------|--------------------------------------|-------------|
| O1-N1                                | 1.2209 (18) | O1-C2                                | 1.391 (3)   |
| O2-N1                                | 1.2156 (18) | O1-C7                                | 1.430 (3)   |
| N1-C4                                | 1.4666 (18) | O2-C3                                | 1.373 (3)   |
| O3-C9                                | 1.2185 (18) | O2-C8                                | 1.424 (3)   |
| O4-C11                               | 1.4197 (18) | O3-C11                               | 1.232 (3)   |
| O4-C12                               | 1.4204 (17) | -                                    | -           |
| Selected bond angles in <b>BNTP</b>  |             | Selected bond angles in <b>BDBC</b>  |             |
| O1-N1-O2                             | 123.58 (14) | C2-O1-C7                             | 113.19 (18) |
| O1-N1-C4                             | 118.31 (14) | C3-O2-C8                             | 116.5 (2)   |
| O2-N1-C4                             | 118.10 (13) | C3-C2-O1                             | 118.8 (2)   |
| C8-C9-O3                             | 120.85 (13) | C4-C3-O2                             | 124.8 (2)   |
| C11-O4-C12                           | 110.80 (12) | C10-C11-O3                           | 125.3 (2)   |

**Table S2** Enrichment ratio for the pair of interatomic contacts in **BNTP**. The enrichment ratio is not calculated for the contacts having random contacts less than 0.9% as these contacts have negligible contribution in the crystal packing.

|                          |             |          |          |          |          |
|--------------------------|-------------|----------|----------|----------|----------|
| <b>Contact %</b>         | <b>Atom</b> | <b>H</b> | <b>C</b> | <b>N</b> | <b>O</b> |
|                          | <b>H</b>    | 34.4     | 18.7     | 0.4      | 32.5     |
|                          | <b>C</b>    | 18.7     | 8.1      | 1        | 3.3      |
|                          | <b>N</b>    | 0.4      | 1        |          | 1        |
|                          | <b>O</b>    | 32.5     | 3.3      | 1        | 0.6      |
| <b>Surface%</b>          |             | 60.2     | 19.6     | 1.2      | 19       |
| <b>Random Contacts %</b> | <b>Atom</b> | <b>H</b> | <b>C</b> | <b>N</b> | <b>O</b> |
|                          | <b>H</b>    | 36.24    |          |          |          |
|                          | <b>C</b>    | 23.60    | 3.84     |          |          |
|                          | <b>N</b>    | 1.44     | 0.47     | 0.01     |          |
|                          | <b>O</b>    | 22.88    | 7.45     | 0.46     | 3.61     |
| <b>Enrichment ratio</b>  | <b>Atom</b> | <b>H</b> | <b>C</b> | <b>N</b> | <b>O</b> |

|  |          |      |      |  |      |
|--|----------|------|------|--|------|
|  | <b>H</b> | 0.95 |      |  |      |
|  | <b>C</b> | 0.79 | 2.11 |  |      |
|  | <b>N</b> | 0.28 |      |  |      |
|  | <b>O</b> | 1.42 | 0.44 |  | 0.17 |

**Table S3** Enrichment ratio for the pair of interatomic contacts in **BNTF**. The enrichment ratio is not calculated for the contacts having random contacts less than 0.9% as these contacts have negligible contribution in the crystal packing.

|                          |             |          |          |          |
|--------------------------|-------------|----------|----------|----------|
| <b>Contact %</b>         | <b>Atom</b> | <b>H</b> | <b>C</b> | <b>O</b> |
|                          | <b>H</b>    | 52.6     | 28.3     | 14.6     |
|                          | <b>C</b>    | 28.3     | 3        | 1.5      |
|                          | <b>O</b>    | 14.6     | 1.5      |          |
| <b>Surface%</b>          |             | 74.05    | 17.9     | 8.05     |
| <b>Random Contacts %</b> | <b>Atom</b> | <b>H</b> | <b>C</b> | <b>O</b> |
|                          | <b>H</b>    | 54.83    |          |          |
|                          | <b>C</b>    | 26.51    | 3.20     |          |
|                          | <b>O</b>    | 11.92    | 2.88     | 0.65     |
| <b>Enrichment ratio</b>  | <b>Atom</b> | <b>H</b> | <b>C</b> | <b>O</b> |
|                          | <b>H</b>    | 0.96     |          |          |
|                          | <b>C</b>    | 1.07     | 0.94     |          |
|                          | <b>O</b>    | 1.22     | 0.52     |          |

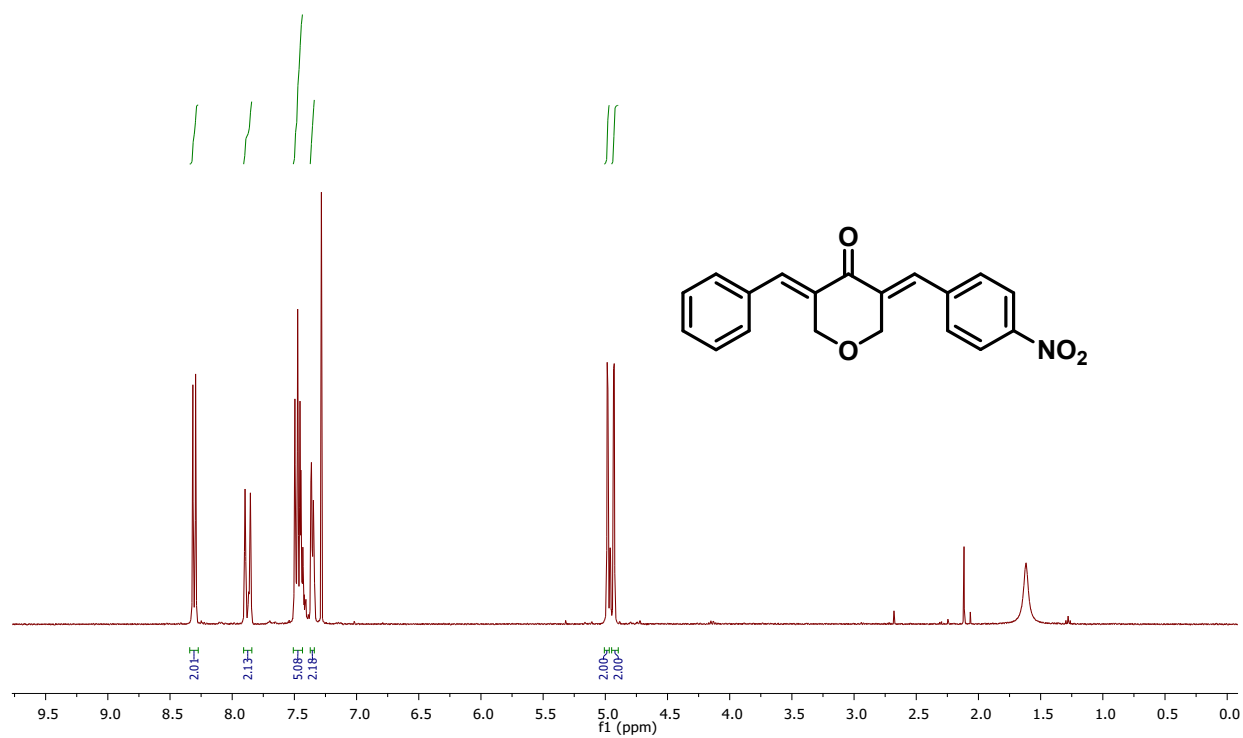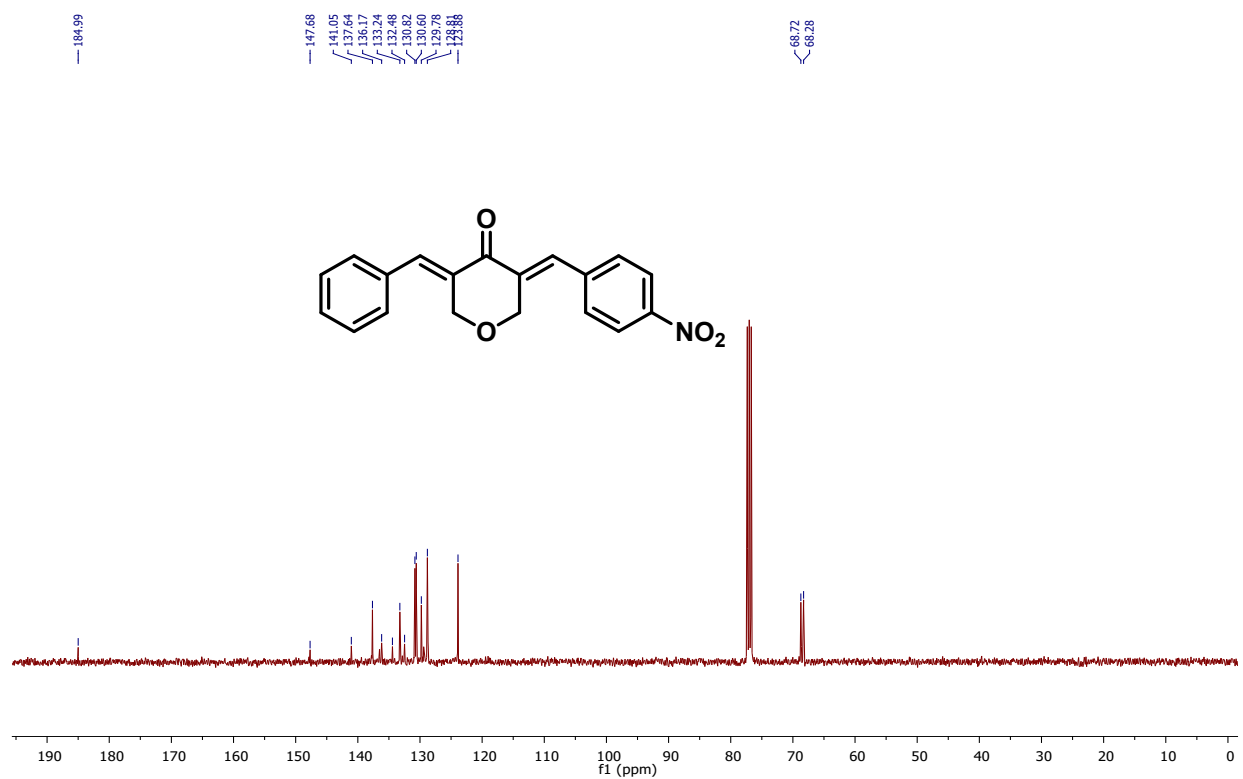

Fig. S1 <sup>1</sup>H and <sup>13</sup>C NMR data of the compound BNTP.

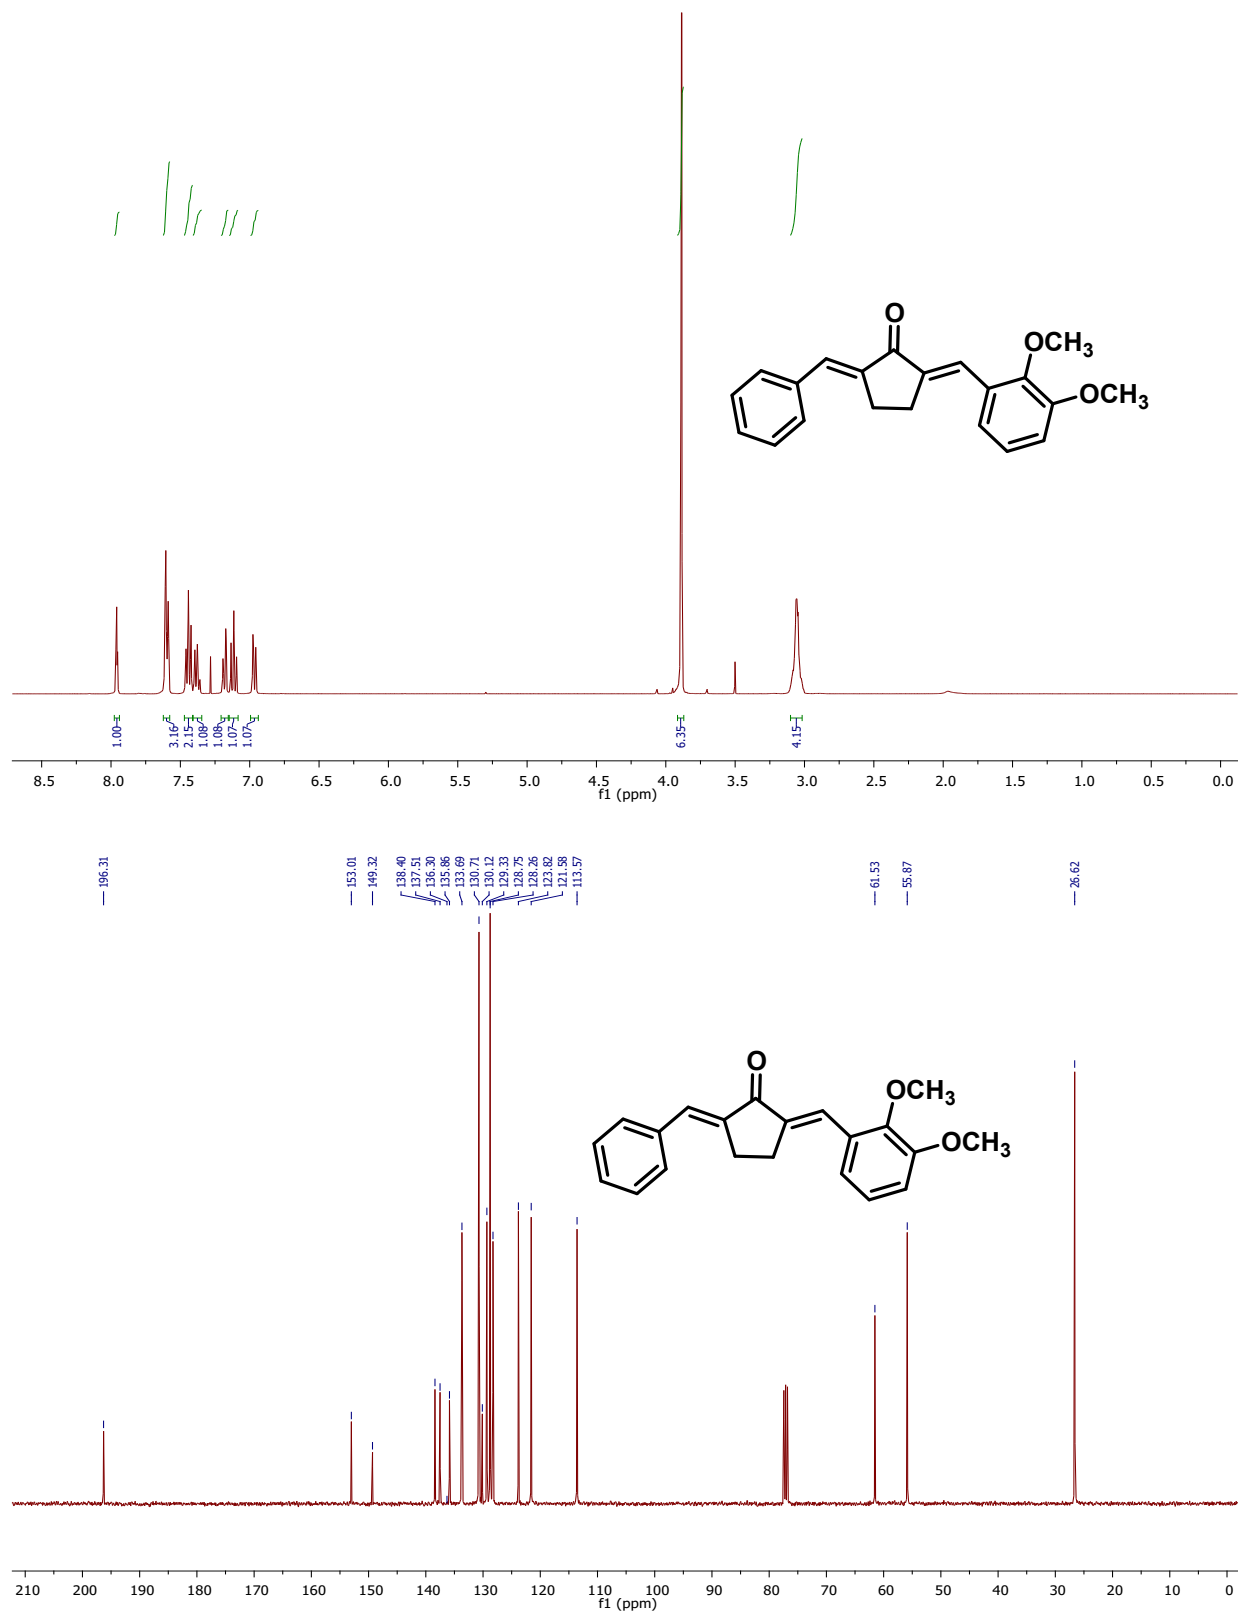

Fig.S2  $^1\text{H}$  and  $^{13}\text{C}$  NMR data of the compound BDBC.

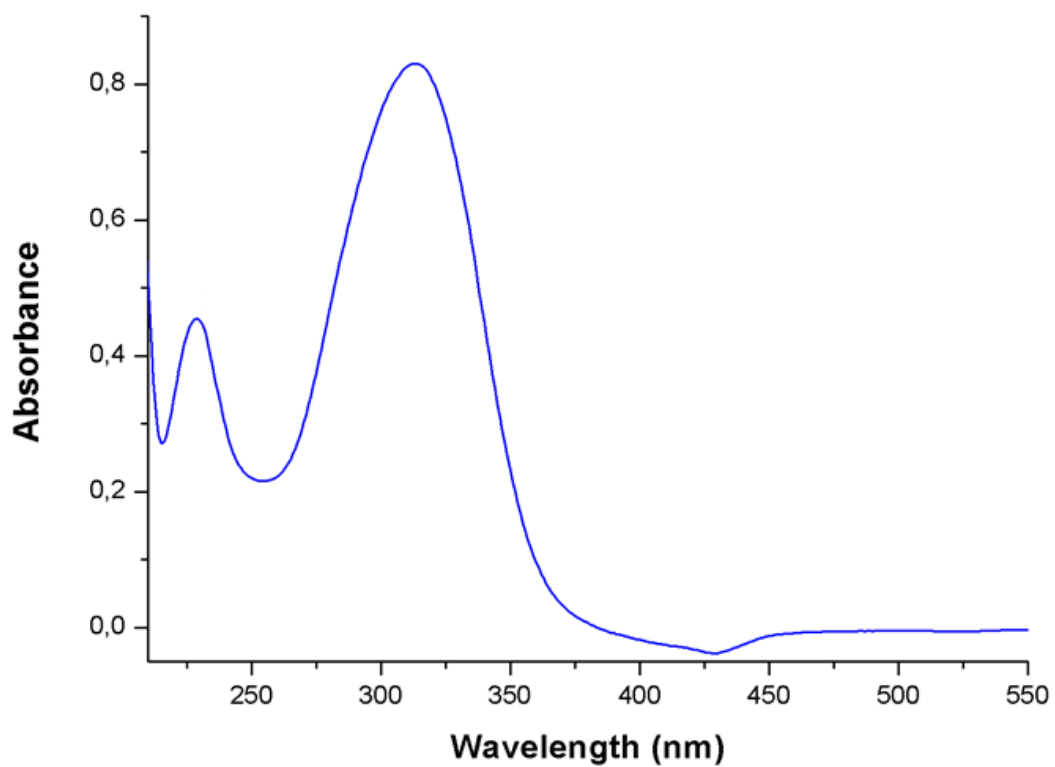

Fig. S3 UV spectrum of the compound **BNTP**.

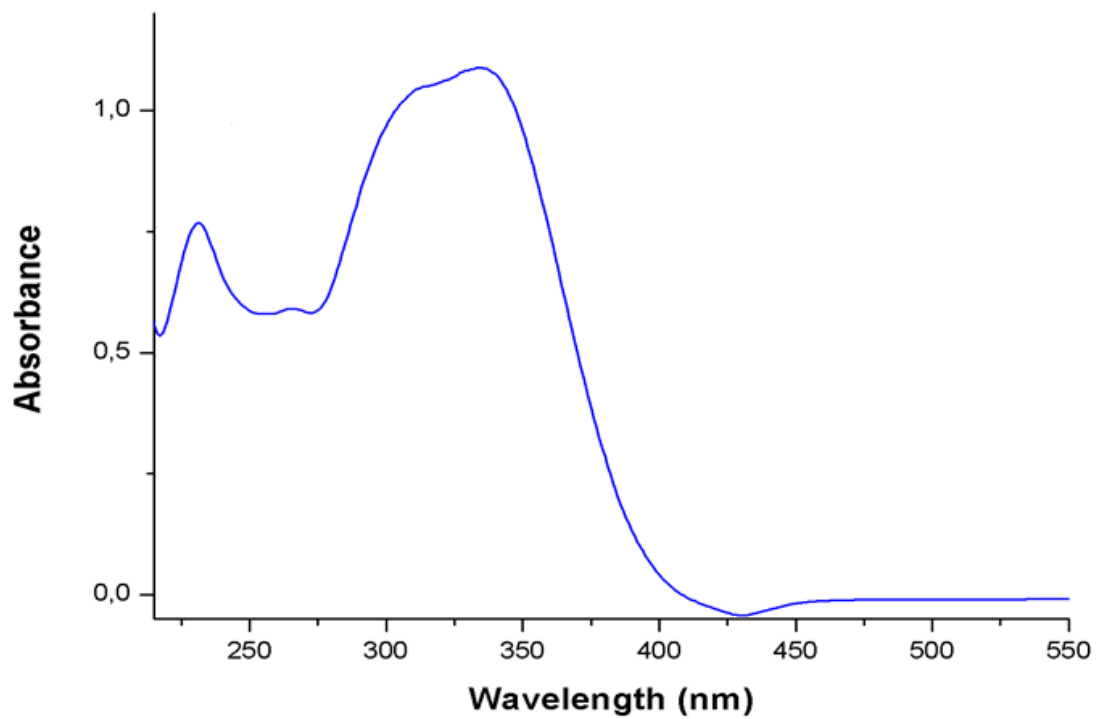

Fig. S4 UV spectrum of the compound **BDBC**.

## IR-Prestige21

### Functional Groups IR values

1. 3053  $\text{cm}^{-1}$  (=C-H)
2. 2833  $\text{cm}^{-1}$ , 2924  $\text{cm}^{-1}$  (=C-H) Antisymmetry, Symmetry
3. 1670  $\text{cm}^{-1}$  (C=O)
4. 1612  $\text{cm}^{-1}$  (C=C)
5. 1492  $\text{cm}^{-1}$  (-CH<sub>2</sub>)
6. 1444  $\text{cm}^{-1}$  (-NO<sub>2</sub>)
7. 1265  $\text{cm}^{-1}$  (C-O)

Comment:  
A1K7iA11

N° of Scans: 64  
Resolution: 4.0  
Apodization: Happ-Genzel

Date/Time: 14/12/2022 09:23:16  
User: LV

 SHIMADZU

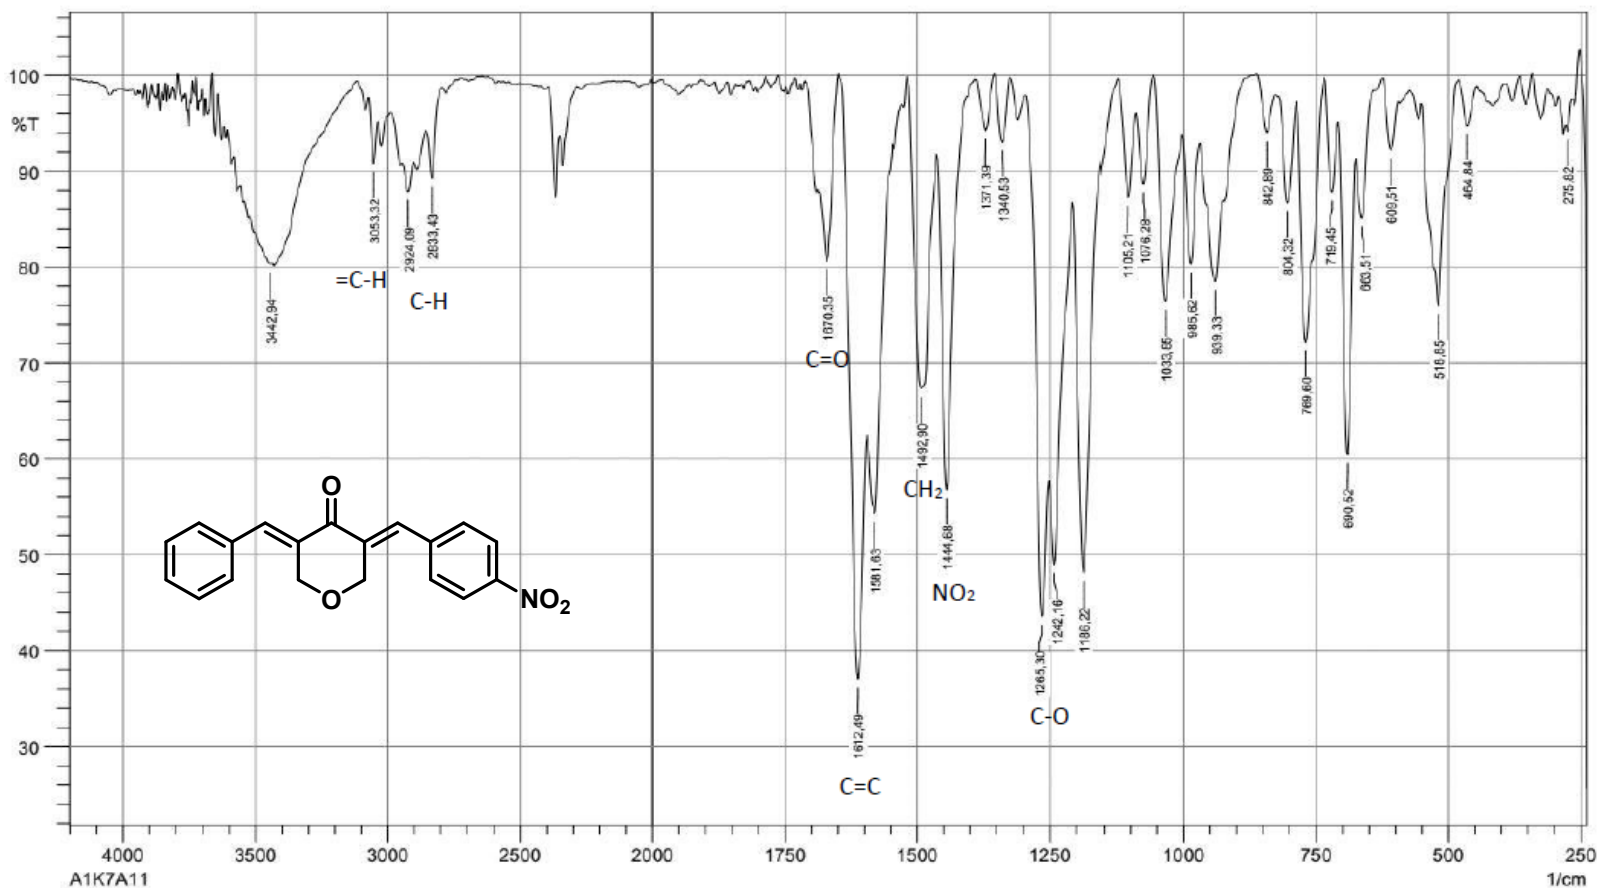

Fig. S5 IR spectrum of the compound BNTP.

IR-Prestige21

Comment:  
A1K10A10

N° of Scans: 64  
Resolution: 4.0  
Apodization: Happ-Genzel

Date/Time: 14/12/2022 09:16:10  
User: LV

SHIMADZU

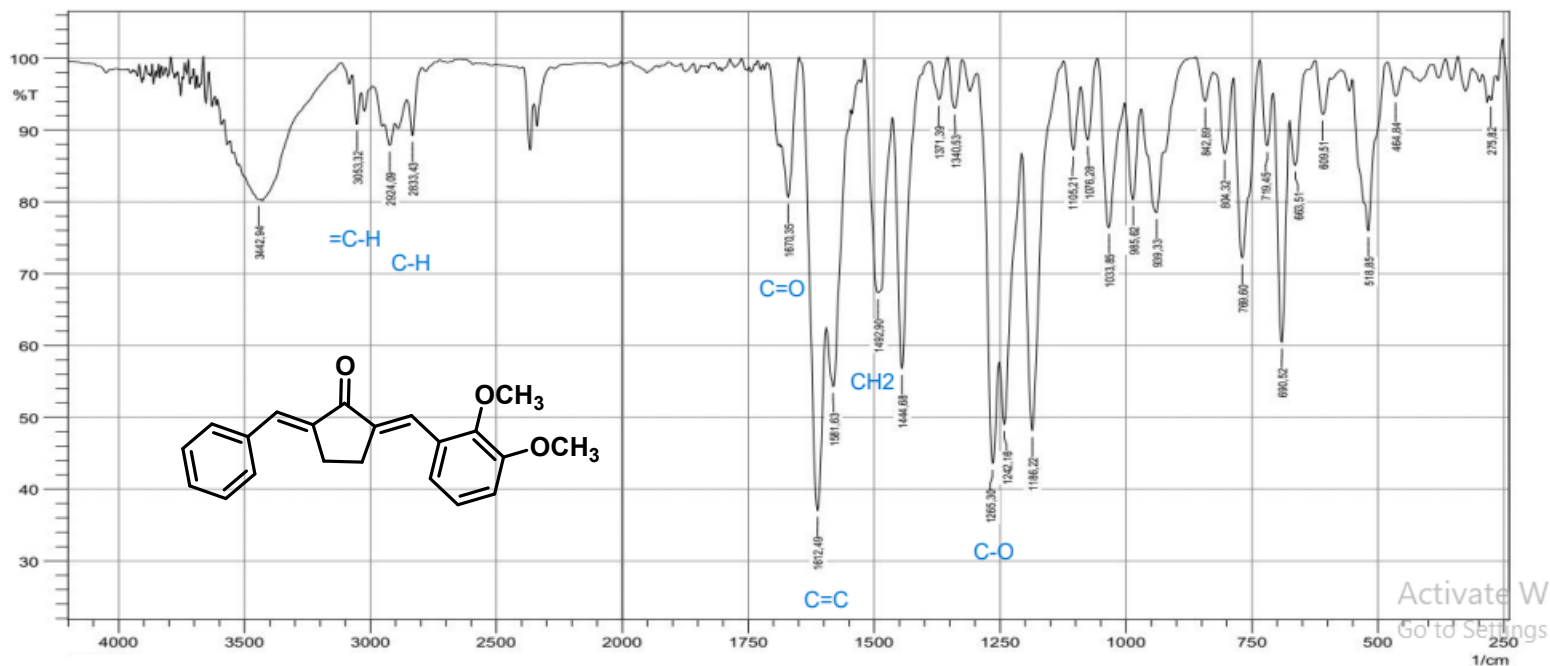

Fig. S6 IR spectrum of the compound BDBC.

## checkCIF/PLATON report of BNTF.

Structure factors have been supplied for datablock(s) A1K7A11

THIS REPORT IS FOR GUIDANCE ONLY. IF USED AS PART OF A REVIEW PROCEDURE FOR PUBLICATION, IT SHOULD NOT REPLACE THE EXPERTISE OF AN EXPERIENCED CRYSTALLOGRAPHIC REFEREE.

No syntax errors found.      CIF dictionary      Interpreting this report

## Datablock: BNTF

Bond precision:      C-C = 0.0021 Å

Wavelength=0.71073

Cell:      a=7.5877 (4)

b=7.2192 (4)

c=28.0023 (14)

alpha=90

beta=90.507 (1)

gamma=90

Temperature:      296 K



|                | Calculated   | Reported     |
|----------------|--------------|--------------|
| Volume         | 1533.83(14)  | 1533.83(14)  |
| Space group    | P 21/n       | P 21/n       |
| Hall group     | -P 2yn       | -P 2yn       |
| Moiety formula | C19 H15 N O4 | C19 H15 N O4 |
| Sum formula    | C19 H15 N O4 | C19 H15 N O4 |
| Mr             | 321.32       | 321.32       |
| Dx, g cm-3     | 1.391        | 1.391        |
| Z              | 4            | 4            |
| Mu (mm-1)      | 0.098        | 0.098        |
| F000           | 672.0        | 672.0        |
| F000'          | 672.35       |              |
| h, k, lmax     | 9, 9, 35     | 9, 9, 35     |
| Nref           | 3262         | 3262         |
| Tmin, Tmax     | 0.963, 0.982 | 0.983, 0.988 |
| Tmin'          | 0.963        |              |

Correction method= # Reported T Limits: Tmin=0.983 Tmax=0.988  
AbsCorr = MULTI-SCAN

Data completeness= 1.000

Theta(max)= 26.729

R(reflections)= 0.0413( 2850)

wR2(reflections)=  
0.1095( 3262)

S = 1.029

Npar= 217

The following ALERTS were generated. Each ALERT has the format

**test-name\_ALERT\_alert-type\_alert-level.**

Click on the hyperlinks for more details of the test.

---

### Alert level G

PLAT978\_ALERT\_2\_G Number C-C Bonds with Positive Residual Density. 15 Info  
PLAT992\_ALERT\_5\_G Repd & Actual \_reflns\_number\_gt Values Differ by 2 Check

- 
- 0 **ALERT level A** = Most likely a serious problem - resolve or explain
- 0 **ALERT level B** = A potentially serious problem, consider carefully
- 0 **ALERT level C** = Check. Ensure it is not caused by an omission or oversight
- 2 **ALERT level G** = General information/check it is not something unexpected
- 
- 0 ALERT type 1 CIF construction/syntax error, inconsistent or missing data  
1 ALERT type 2 Indicator that the structure model may be wrong or deficient  
0 ALERT type 3 Indicator that the structure quality may be low  
0 ALERT type 4 Improvement, methodology, query or suggestion  
1 ALERT type 5 Informative message, check
- 

It is advisable to attempt to resolve as many as possible of the alerts in all categories. Often the minor alerts point to easily fixed oversights, errors and omissions in your CIF or refinement strategy, so attention to these fine details can be worthwhile. In order to resolve some of the more serious problems it may be necessary to carry out additional measurements or structure refinements. However, the purpose of your study may justify the reported deviations and the more serious of these should normally be commented upon in the discussion or experimental section of a paper or in the "special\_details" fields of the CIF. checkCIF was carefully designed to identify outliers and unusual parameters, but every test has its limitations and alerts that are not important in a particular case may appear. Conversely, the absence of alerts does not guarantee there are no aspects of the results needing attention. It is up to the individual to critically assess their own results and, if necessary, seek expert advice.

### Publication of your CIF in IUCr journals

A basic structural check has been run on your CIF. These basic checks will be run on all CIFs submitted for publication in IUCr journals (*Acta Crystallographica*, *Journal of Applied Crystallography*, *Journal of Synchrotron Radiation*); however, if you intend to submit to *Acta Crystallographica Section C* or *E* or *IUCrData*, you should make sure that full publication checks are run on the final version of your CIF prior to submission.

### Publication of your CIF in other journals

Please refer to the *Notes for Authors* of the relevant journal for any special instructions relating to CIF submission.

PLATON version of 19/02/2022; check.def file version of 19/02/2022

Datablock A1K7A11 - ellipsoid plot

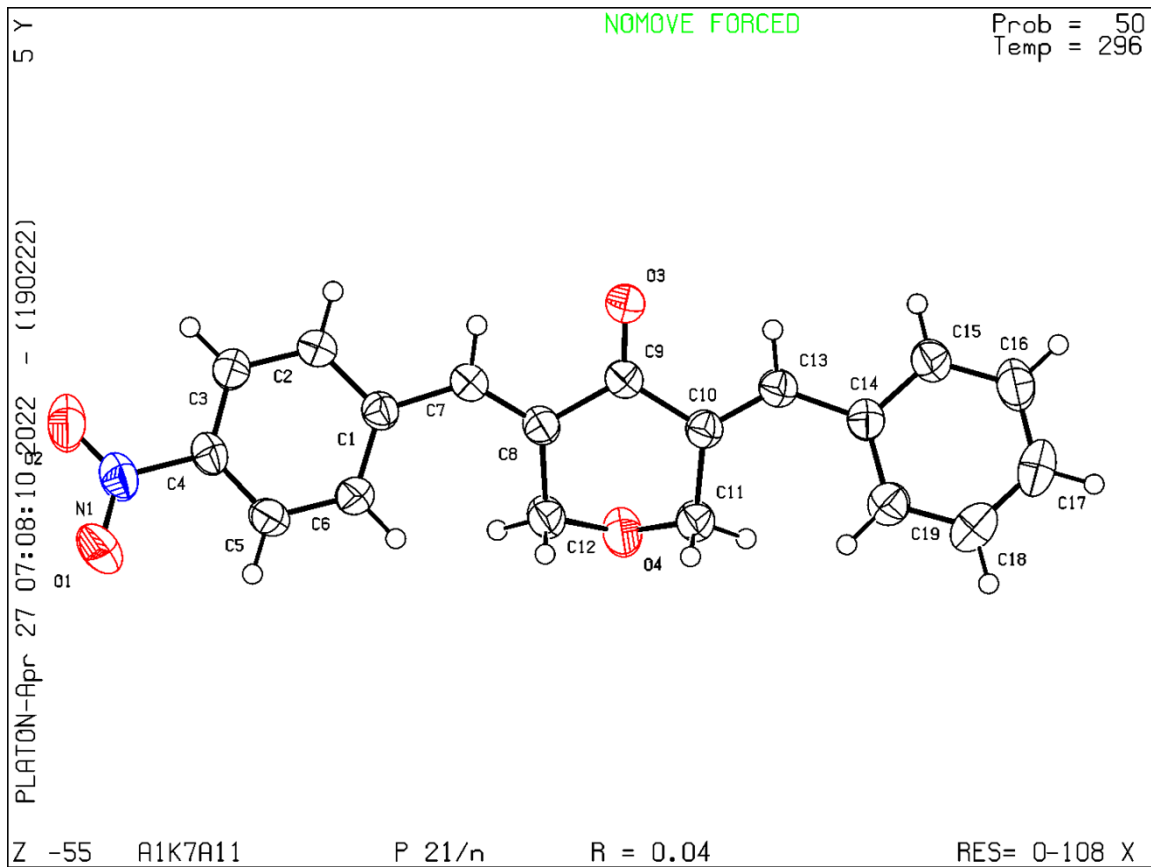



The following ALERTS were generated. Each ALERT has the format

**test-name\_ALERT\_alert-type\_alert-level.**

Click on the hyperlinks for more details of the test.

---

### Alert level C

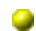

PLAT906\_ALERT\_3\_C Large K Value in the Analysis of Variance ..... 7.164 Check

---

### Alert level G

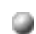

PLAT978\_ALERT\_2\_G Number C-C Bonds with Positive Residual Density. 4 Info

- 
- 0 **ALERT level A** = Most likely a serious problem - resolve or explain
  - 0 **ALERT level B** = A potentially serious problem, consider carefully
  - 1 **ALERT level C** = Check. Ensure it is not caused by an omission or oversight
  - 1 **ALERT level G** = General information/check it is not something unexpected
- 
- 0 ALERT type 1 CIF construction/syntax error, inconsistent or missing data
  - 1 ALERT type 2 Indicator that the structure model may be wrong or deficient
  - 1 ALERT type 3 Indicator that the structure quality may be low
  - 0 ALERT type 4 Improvement, methodology, query or suggestion
  - 0 ALERT type 5 Informative message, check
- 

It is advisable to attempt to resolve as many as possible of the alerts in all categories. Often the minor alerts point to easily fixed oversights, errors and omissions in your CIF or refinement strategy, so attention to these fine details can be worthwhile. In order to resolve some of the more serious problems it may be necessary to carry out additional measurements or structure refinements. However, the purpose of your study may justify the reported deviations and the more serious of these should normally be commented upon in the discussion or experimental section of a paper or in the "special\_details" fields of the CIF. checkCIF was carefully designed to identify outliers and unusual parameters, but every test has its limitations and alerts that are not important in a particular case may appear. Conversely, the absence of alerts does not guarantee there are no aspects of the results needing attention. It is up to the individual to critically assess their own results and, if necessary, seek expert advice.

### Publication of your CIF in IUCr journals

A basic structural check has been run on your CIF. These basic checks will be run on all CIFs submitted for publication in IUCr journals (*Acta Crystallographica*, *Journal of Applied Crystallography*, *Journal of Synchrotron Radiation*); however, if you intend to submit to *Acta Crystallographica Section C* or *E* or *IUCrData*, you should make sure that full publication checks are run on the final version of your CIF prior to submission.

### Publication of your CIF in other journals

Please refer to the *Notes for Authors* of the relevant journal for any special instructions relating to CIF submission.

PLATON version of 19/02/2022; check.def file version of 19/02/2022

Datablock A1K10A10 - ellipsoid plot

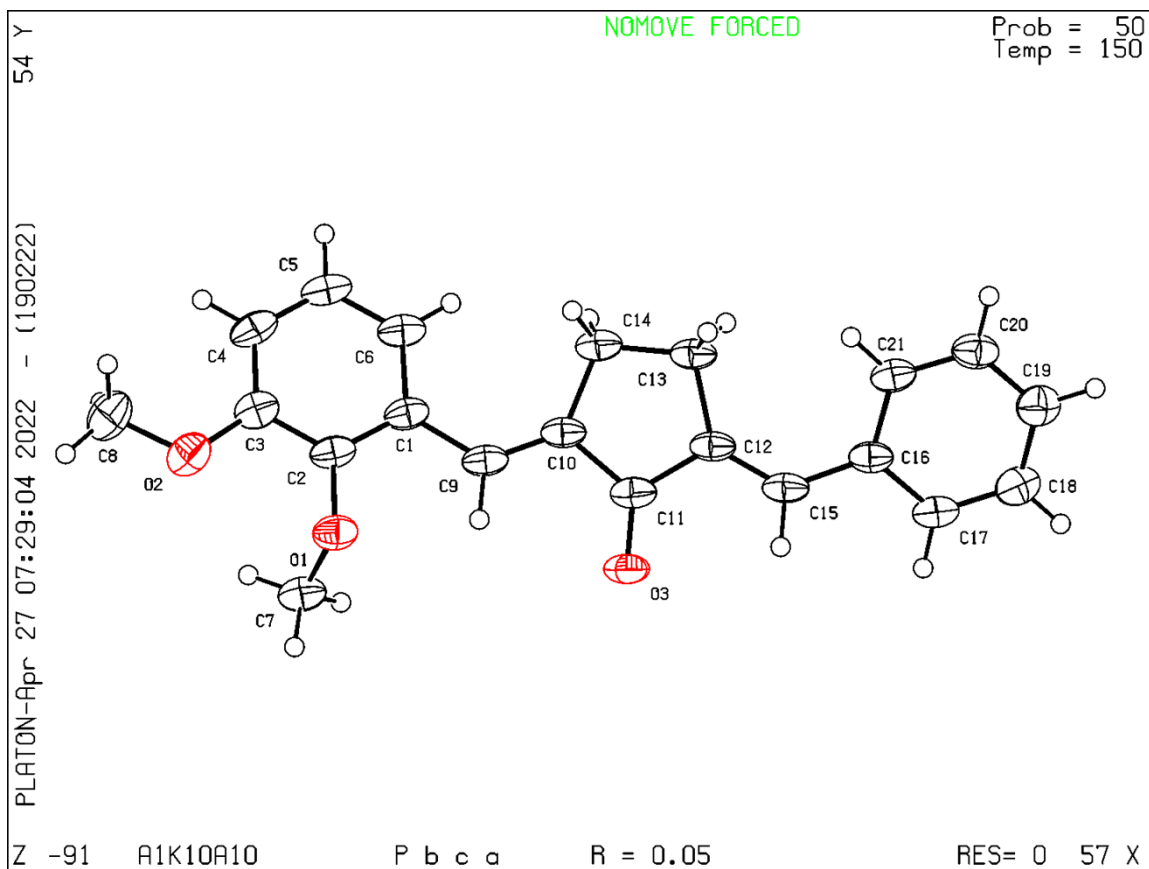

### CIF of BNTP without HKL data

data\_global

#=====

# PROCESSING SUMMARY (IUCr Office Use only)

\_publ\_contact\_author

;

Muhammad Nawaz Tahir

University of Sargodha

Department of Physics

Sargodha

Pakistan

;

\_publ\_contact\_author\_phone '0092 48 92 30 914'

\_publ\_contact\_author\_fax '0092 48 32 22 121'

\_publ\_contact\_author\_email 'dmntahir\_uos@yahoo.com'

\_publ\_requested\_journal ''

\_journal\_date\_recd\_electronic ?

\_journal\_date\_to\_coeditor ?

\_journal\_date\_from\_coeditor ?

\_journal\_date\_accepted ?

\_journal\_date\_printers\_first ?

\_journal\_date\_printers\_final ?

\_journal\_date\_proofs\_out ?

\_journal\_date\_proofs\_in ?

\_journal\_coeditor\_name ?

\_journal\_coeditor\_code ?



\_journal\_paper\_category ?

\_journal\_coeditor\_notes

;

;

\_journal\_techeditor\_code ?

\_iucr\_compatibility\_tag ?

\_journal\_techeditor\_notes

;

;

\_journal\_coden\_ASTM ?

\_journal\_name\_full ?

\_journal\_year ?

\_journal\_volume ?

\_journal\_issue ?

\_journal\_page\_first ?

\_journal\_page\_last ?

\_journal\_suppl\_publ\_number ?

\_journal\_suppl\_publ\_pages ?

#=====

loop\_

\_publ\_author\_name

\_publ\_author\_address

'Muhammad Ashfaq'

;

Department of Physics

University of Sargodha

Sargodha

Pakistan

;

'Muhammad Nawaz Tahir'

;

Department of Physics

University of Sargodha

Sargodha

Pakistan

;

'Aleksey Kuznetsov'

;

Departamento deQuímica, Campus Santiago Vitacura

Universidad Tecnica Federico Santa María

Av. Santa María 6400 Vitacura

Chile

;

'Akbar Ali'

;

Department of Chemistry

University of Sargodha

Sargodha-40100

Pakistan

;

\_audit\_creation\_date ?

\_audit\_creation\_method ?

#=====

# TEXT

\_publ\_section\_title

;

(3E,5E)-3-benzylidene-5-(4-nitrobenzylidene)dihydro-2H-pyran-4(3H)-one

;

\_publ\_section\_abstract

;

;

\_publ\_section\_comment

;

;

\_publ\_section\_exptl\_refinement

;

;

\_publ\_section\_exptl\_prep

;

;

\_publ\_section\_related\_literature

;

;

\_publ\_section\_references

;

Bruker (2007). *SADABS*. Bruker AXS Inc., Madison, Wisconsin, USA.

Bruker (2007). *APEX2* and *SAINT*. Bruker AXS Inc.,  
Madison, Wisconsin, USA.

Farrugia, L. J. (2012). *J. Appl. Cryst.* **45**, 849--854.

Sheldrick, G. M. (2014). <i>Acta Cryst.</i> A**70**, C1437.

Sheldrick, G. M. (2015). <i>Acta Cryst.</i> C**71**, 3--8.

Spek, A. L. (2009). <i>Acta Cryst.</i> D**65**, 148--155.

;

\_publ\_section\_figure\_captions

;

;

\_publ\_section\_acknowledgements

;

;

data\_A1K7A11

\_audit\_creation\_method 'SHELXL-2019/2'

\_shelx\_SHELXL\_version\_number '2019/2'

\_chemical\_name\_common ?

\_chemical\_absolute\_configuration '.'

\_chemical\_name\_systematic

;

(3E,5E)-3-benzylidene-5-(4-nitrobenzylidene)dihydro-2H-pyran-4(3H)-one

;

\_chemical\_formula\_moiety 'C19 H15 N O4'

\_chemical\_formula\_sum 'C19 H15 N O4'

\_chemical\_formula\_iupac 'C19 H15 N O4'

\_chemical\_formula\_weight 321.32

loop\_

\_atom\_type\_symbol

\_atom\_type\_description

\_atom\_type\_scatter\_dispersion\_real

\_atom\_type\_scatter\_dispersion\_imag

\_atom\_type\_scatter\_source

'C' 'C' 0.0033 0.0016

'International Tables Vol C Tables 4.2.6.8 and 6.1.1.4'

'H' 'H' 0.0000 0.0000

'International Tables Vol C Tables 4.2.6.8 and 6.1.1.4'

'N' 'N' 0.0061 0.0033

'International Tables Vol C Tables 4.2.6.8 and 6.1.1.4'

'O' 'O' 0.0106 0.0060

'International Tables Vol C Tables 4.2.6.8 and 6.1.1.4'

\_space\_group\_crystal\_system monoclinic

\_space\_group\_IT\_number 14

\_space\_group\_name\_H-M\_alt 'P 21/n'

\_space\_group\_name\_Hall '-P 2yn'

\_shelx\_space\_group\_comment

;

The symmetry employed for this shelxl refinement is uniquely defined by the following loop, which should always be used as a source of symmetry information in preference to the above space-group names.

They are only intended as comments.

;

loop\_

\_space\_group\_symop\_operation\_xyz

'x, y, z'

'-x+1/2, y+1/2, -z+1/2'

'-x, -y, -z'

'x-1/2, -y-1/2, z-1/2'

|                               |             |
|-------------------------------|-------------|
| _cell_length_a                | 7.5877(4)   |
| _cell_length_b                | 7.2192(4)   |
| _cell_length_c                | 28.0023(14) |
| _cell_angle_alpha             | 90          |
| _cell_angle_beta              | 90.5070(10) |
| _cell_angle_gamma             | 90          |
| _cell_volume                  | 1533.83(14) |
| _cell_formula_units_Z         | 4           |
| _cell_measurement_reflns_used | 2850        |
| _cell_measurement_theta_min   | 1.454       |
| _cell_measurement_theta_max   | 26.729      |

\_cell\_measurement\_temperature 296(2)  
\_exptl\_crystal\_description needle  
\_exptl\_crystal\_colour 'white'  
\_exptl\_crystal\_size\_max 0.381  
\_exptl\_crystal\_size\_mid 0.375  
\_exptl\_crystal\_size\_min 0.186  
\_exptl\_crystal\_density\_diffn 1.391  
\_exptl\_crystal\_density\_meas ?  
\_exptl\_crystal\_density\_method 'not measured'  
\_exptl\_crystal\_F\_000 672  
\_exptl\_absorpt\_coefficient\_mu 0.098  
\_exptl\_absorpt\_correction\_type multi-scan  
\_exptl\_absorpt\_process\_details '(SADABS; Bruker, 2007)'  
\_exptl\_absorpt\_correction\_T\_min 0.983  
\_exptl\_absorpt\_correction\_T\_max 0.988  
\_exptl\_special\_details  
;  
;

\_diffn\_ambient\_temperature 296(2)  
\_diffn\_radiation\_type MoK\alpha  
\_diffn\_radiation\_wavelength 0.71073  
\_diffn\_radiation\_source 'fine-focus sealed tube'  
\_diffn\_radiation\_monochromator graphite



\_diffraction\_measurement\_device\_type 'Bruker Kappa APEXII CCD'  
\_diffraction\_measurement\_method \w  
\_diffraction\_detector\_area\_resol\_mean 7.901  
\_diffraction\_reflns\_number 24896  
\_diffraction\_reflns\_av\_unetl/netl 0.0107  
\_diffraction\_reflns\_av\_R\_equivalents 0.0194  
\_diffraction\_reflns\_limit\_h\_min -9  
\_diffraction\_reflns\_limit\_h\_max 9  
\_diffraction\_reflns\_limit\_k\_min -9  
\_diffraction\_reflns\_limit\_k\_max 9  
\_diffraction\_reflns\_limit\_l\_min -35  
\_diffraction\_reflns\_limit\_l\_max 35  
\_diffraction\_reflns\_theta\_min 1.454  
\_diffraction\_reflns\_theta\_max 26.729  
\_diffraction\_reflns\_theta\_full 25.242  
\_diffraction\_measured\_fraction\_theta\_max 1.000  
\_diffraction\_measured\_fraction\_theta\_full 1.000  
\_diffraction\_reflns\_Laue\_measured\_fraction\_max 1.000  
\_diffraction\_reflns\_Laue\_measured\_fraction\_full 1.000  
\_diffraction\_reflns\_point\_group\_measured\_fraction\_max 1.000  
\_diffraction\_reflns\_point\_group\_measured\_fraction\_full 1.000  
\_diffraction\_standards\_number 0  
\_diffraction\_standards\_interval\_count ?  
\_diffraction\_standards\_interval\_time ?  
\_diffraction\_standards\_decay\_% ?

\_refine\_special\_details

;

Refinement of  $\langle F \rangle^2$  against ALL reflections. The weighted  $\langle R \rangle$ -factor  $\langle wR \rangle$  and goodness of fit  $\langle S \rangle$  are based on  $\langle F \rangle^2$ , conventional  $\langle R \rangle$ -factors  $\langle R \rangle$  are based on  $\langle F \rangle$ , with  $\langle F \rangle$  set to zero for negative  $\langle F \rangle^2$ . The threshold expression of  $\langle F \rangle^2 > \sqrt{\langle F \rangle^2}$  is used only for calculating  $\langle R \rangle$ -factors(gt) etc. and is not relevant to the choice of reflections for refinement.

$\langle R \rangle$ -factors based on  $\langle F \rangle^2$  are statistically about twice as large as those based on  $\langle F \rangle$ , and  $\langle R \rangle$ -factors based on ALL data will be even larger.

;

|                                  |                 |
|----------------------------------|-----------------|
| _reflns_number_total             | 3262            |
| _reflns_number_gt                | 2850            |
| _reflns_threshold_expression     | $I > 2\sqrt{I}$ |
| _refine_ls_structure_factor_coef | Fsqd            |
| _refine_ls_matrix_type           | full            |
| _refine_ls_R_factor_all          | 0.0474          |
| _refine_ls_R_factor_gt           | 0.0413          |
| _refine_ls_wR_factor_ref         | 0.1095          |
| _refine_ls_wR_factor_gt          | 0.1044          |
| _refine_ls_goodness_of_fit_ref   | 1.029           |
| _refine_ls_restrained_S_all      | 1.029           |
| _refine_ls_number_reflns         | 3262            |

```
_refine_ls_number_parameters 217
_refine_ls_number_restraints 0
_refine_ls_extinction_method none
_refine_ls_extinction_coef .
_refine_ls_hydrogen_treatment constr
_refine_ls_weighting_scheme calc
_refine_ls_weighting_details
'w=1/[\s^2^(Fo^2^)+(0.0472P)^2^+0.5545P] where P=(Fo^2^+2Fc^2^)/3'
_atom_sites_solution_hydrogens geom
_atom_sites_solution_primary direct
_atom_sites_solution_secondary difmap
_refine_ls_shift/su_max 0.000
_refine_ls_shift/su_mean 0.000
_computing_data_collection 'APEX2 (Bruker, 2007)'
_computing_cell_refinement 'SAINT (Bruker, 2007)'
_computing_data_reduction 'SAINT (Bruker, 2007)'
_computing_structure_solution 'SHELXT-2015 (Sheldrick, 2015)'
_computing_structure_refinement 'SHELXL-2019/2 (Sheldrick, 2019)'
_computing_molecular_graphics
'ORTEP-3 for Windows (Farrugia, 2012) and PLATON (Spek, 2009)'
_computing_publication_material
;
WinGX (Farrugia, 2012) and PLATON (Spek, 2009)
;
```

loop\_

\_atom\_site\_label

\_atom\_site\_type\_symbol

\_atom\_site\_fract\_x

\_atom\_site\_fract\_y

\_atom\_site\_fract\_z

\_atom\_site\_U\_iso\_or\_equiv

\_atom\_site\_adp\_type

\_atom\_site\_occupancy

\_atom\_site\_site\_symmetry\_order

\_atom\_site\_calc\_flag

\_atom\_site\_refinement\_flags\_posn

\_atom\_site\_refinement\_flags\_adp

\_atom\_site\_refinement\_flags\_occupancy

\_atom\_site\_disorder\_assembly

\_atom\_site\_disorder\_group

O1 O -0.32508(16) 0.6976(2) -0.15387(5) 0.0703(4) Uani 1 1 d . . . . .

O2 O -0.16115(18) 0.5255(2) -0.19751(5) 0.0798(4) Uani 1 1 d . . . . .

O3 O 0.71000(14) 0.7812(2) 0.01037(4) 0.0708(4) Uani 1 1 d . . . . .

O4 O 0.30539(14) 0.68285(17) 0.09411(4) 0.0539(3) Uani 1 1 d . . . . .

N1 N -0.18561(17) 0.6204(2) -0.16233(5) 0.0513(3) Uani 1 1 d . . . . .

C1 C 0.23546(17) 0.69275(19) -0.06442(5) 0.0368(3) Uani 1 1 d . . . . .

C2 C 0.26412(18) 0.6197(2) -0.10970(5) 0.0411(3) Uani 1 1 d . . . . .

H2 H 0.378162 0.588637 -0.118585 0.049 Uiso 1 1 calc R U . . .

C3 C 0.12725(19) 0.5924(2) -0.14169(5) 0.0423(3) Uani 1 1 d . . . . .

H3 H 0.147391 0.541166 -0.171616 0.051 Uiso 1 1 calc R U . . .  
C4 C -0.03952(18) 0.64298(19) -0.12818(5) 0.0393(3) Uani 1 1 d . . . . .  
C5 C -0.07372(19) 0.7177(2) -0.08424(5) 0.0454(3) Uani 1 1 d . . . . .  
H5 H -0.187833 0.751522 -0.076101 0.054 Uiso 1 1 calc R U . . .  
C6 C 0.06367(19) 0.7418(2) -0.05224(5) 0.0448(3) Uani 1 1 d . . . . .  
H6 H 0.041600 0.791403 -0.022231 0.054 Uiso 1 1 calc R U . . .  
C7 C 0.38933(18) 0.7217(2) -0.03336(5) 0.0403(3) Uani 1 1 d . . . . .  
H7 H 0.496814 0.723396 -0.049062 0.048 Uiso 1 1 calc R U . . .  
C8 C 0.40033(17) 0.74602(19) 0.01377(5) 0.0382(3) Uani 1 1 d . . . . .  
C9 C 0.57861(18) 0.7828(2) 0.03507(5) 0.0420(3) Uani 1 1 d . . . . .  
C10 C 0.58892(18) 0.82720(19) 0.08686(5) 0.0372(3) Uani 1 1 d . . . . .  
C11 C 0.41995(19) 0.8177(2) 0.11433(5) 0.0461(4) Uani 1 1 d . . . . .  
H11A H 0.445436 0.786103 0.147338 0.055 Uiso 1 1 calc R U . . .  
H11B H 0.362768 0.937884 0.113781 0.055 Uiso 1 1 calc R U . . .  
C12 C 0.24838(19) 0.7373(3) 0.04774(5) 0.0490(4) Uani 1 1 d . . . . .  
H12A H 0.192562 0.857981 0.049484 0.059 Uiso 1 1 calc R U . . .  
H12B H 0.161719 0.649494 0.035877 0.059 Uiso 1 1 calc R U . . .  
C13 C 0.74777(18) 0.86477(19) 0.10560(5) 0.0392(3) Uani 1 1 d . . . . .  
H13 H 0.840759 0.853469 0.084384 0.047 Uiso 1 1 calc R U . . .  
C14 C 0.79921(18) 0.92056(19) 0.15385(5) 0.0382(3) Uani 1 1 d . . . . .  
C15 C 0.9736(2) 0.8908(2) 0.16801(5) 0.0474(4) Uani 1 1 d . . . . .  
H15 H 1.050513 0.832369 0.147173 0.057 Uiso 1 1 calc R U . . .  
C16 C 1.0341(2) 0.9463(3) 0.21224(6) 0.0588(4) Uani 1 1 d . . . . .  
H16 H 1.150418 0.923623 0.221233 0.071 Uiso 1 1 calc R U . . .  
C17 C 0.9228(3) 1.0350(3) 0.24302(6) 0.0609(5) Uani 1 1 d . . . . .

H17 H 0.963743 1.073189 0.272828 0.073 Uiso 1 1 calc R U . . .  
C18 C 0.7506(3) 1.0674(2) 0.22986(6) 0.0556(4) Uani 1 1 d . . . . .  
H18 H 0.675650 1.127991 0.250797 0.067 Uiso 1 1 calc R U . . .  
C19 C 0.6881(2) 1.0105(2) 0.18572(5) 0.0453(3) Uani 1 1 d . . . . .  
H19 H 0.571210 1.032422 0.177244 0.054 Uiso 1 1 calc R U . . .

loop\_

\_atom\_site\_aniso\_label

\_atom\_site\_aniso\_U\_11

\_atom\_site\_aniso\_U\_22

\_atom\_site\_aniso\_U\_33

\_atom\_site\_aniso\_U\_23

\_atom\_site\_aniso\_U\_13

\_atom\_site\_aniso\_U\_12

O1 0.0410(6) 0.0954(10) 0.0742(9) 0.0037(7) -0.0155(6) 0.0116(7)  
O2 0.0713(9) 0.1046(11) 0.0630(8) -0.0256(8) -0.0292(7) 0.0127(8)  
O3 0.0358(6) 0.1329(13) 0.0438(6) -0.0222(7) 0.0033(5) -0.0064(7)  
O4 0.0480(6) 0.0744(8) 0.0393(5) 0.0128(5) -0.0040(4) -0.0218(5)  
N1 0.0443(7) 0.0599(8) 0.0495(7) 0.0057(6) -0.0128(6) -0.0007(6)  
C1 0.0348(7) 0.0395(7) 0.0362(7) 0.0028(5) -0.0015(5) -0.0006(5)  
C2 0.0346(7) 0.0474(8) 0.0415(7) -0.0025(6) 0.0010(6) 0.0031(6)  
C3 0.0435(8) 0.0460(8) 0.0374(7) -0.0040(6) -0.0028(6) 0.0018(6)  
C4 0.0364(7) 0.0413(7) 0.0402(7) 0.0066(6) -0.0071(6) -0.0027(6)  
C5 0.0328(7) 0.0602(9) 0.0432(8) 0.0035(7) 0.0011(6) 0.0042(6)  
C6 0.0392(8) 0.0602(9) 0.0350(7) -0.0012(6) 0.0008(6) 0.0060(7)

C7 0.0330(7) 0.0472(8) 0.0405(7) -0.0019(6) -0.0011(5) 0.0015(6)  
C8 0.0343(7) 0.0413(7) 0.0389(7) 0.0013(6) -0.0024(5) -0.0007(6)  
C9 0.0346(7) 0.0523(8) 0.0391(7) -0.0011(6) -0.0002(6) -0.0007(6)  
C10 0.0363(7) 0.0404(7) 0.0350(7) 0.0020(5) -0.0005(5) 0.0001(6)  
C11 0.0391(8) 0.0626(9) 0.0366(7) 0.0019(7) 0.0001(6) -0.0064(7)  
C12 0.0371(8) 0.0708(10) 0.0390(7) 0.0060(7) -0.0022(6) -0.0097(7)  
C13 0.0360(7) 0.0431(7) 0.0383(7) 0.0008(6) 0.0012(5) -0.0008(6)  
C14 0.0398(7) 0.0381(7) 0.0367(7) 0.0036(5) -0.0020(5) -0.0056(6)  
C15 0.0401(8) 0.0566(9) 0.0455(8) -0.0005(7) -0.0022(6) -0.0050(7)  
C16 0.0511(9) 0.0729(11) 0.0522(9) 0.0009(8) -0.0146(7) -0.0090(8)  
C17 0.0793(12) 0.0625(11) 0.0406(8) -0.0035(8) -0.0143(8) -0.0098(9)  
C18 0.0780(12) 0.0478(9) 0.0412(8) -0.0021(7) 0.0041(8) 0.0031(8)  
C19 0.0488(8) 0.0432(8) 0.0439(8) 0.0018(6) -0.0010(6) 0.0032(6)

\_geom\_special\_details

;

All esds (except the esd in the dihedral angle between two l.s. planes) are estimated using the full covariance matrix. The cell esds are taken into account individually in the estimation of esds in distances, angles and torsion angles; correlations between esds in cell parameters are only used when they are defined by crystal symmetry. An approximate (isotropic) treatment of cell esds is used for estimating esds involving l.s. planes.

;

loop\_

\_geom\_bond\_atom\_site\_label\_1

\_geom\_bond\_atom\_site\_label\_2

\_geom\_bond\_distance

\_geom\_bond\_site\_symmetry\_2

\_geom\_bond\_publ\_flag

O1 N1 1.2209(18) . ?

O2 N1 1.2156(18) . ?

O3 C9 1.2185(18) . ?

O4 C11 1.4197(18) . ?

O4 C12 1.4204(17) . ?

N1 C4 1.4666(18) . ?

C1 C2 1.3918(19) . ?

C1 C6 1.3960(19) . ?

C1 C7 1.4647(18) . ?

C2 C3 1.3798(19) . ?

C2 H2 0.9300 . ?

C3 C4 1.373(2) . ?

C3 H3 0.9300 . ?

C4 C5 1.370(2) . ?

C5 C6 1.380(2) . ?

C5 H5 0.9300 . ?

C6 H6 0.9300 . ?

C7 C8 1.3334(19) . ?

C7 H7 0.9300 . ?

C8 C9 1.4974(19) . ?



C8 C12 1.502(2) . ?  
C9 C10 1.4863(19) . ?  
C10 C13 1.3382(19) . ?  
C10 C11 1.5025(19) . ?  
C11 H11A 0.9700 . ?  
C11 H11B 0.9700 . ?  
C12 H12A 0.9700 . ?  
C12 H12B 0.9700 . ?  
C13 C14 1.4597(19) . ?  
C13 H13 0.9300 . ?  
C14 C19 1.393(2) . ?  
C14 C15 1.395(2) . ?  
C15 C16 1.377(2) . ?  
C15 H15 0.9300 . ?  
C16 C17 1.371(3) . ?  
C16 H16 0.9300 . ?  
C17 C18 1.374(3) . ?  
C17 H17 0.9300 . ?  
C18 C19 1.382(2) . ?  
C18 H18 0.9300 . ?  
C19 H19 0.9300 . ?

loop\_

\_geom\_angle\_atom\_site\_label\_1

\_geom\_angle\_atom\_site\_label\_2

\_geom\_angle\_atom\_site\_label\_3

\_geom\_angle

\_geom\_angle\_site\_symmetry\_1

\_geom\_angle\_site\_symmetry\_3

\_geom\_angle\_publ\_flag

C11 O4 C12 110.80(12) . . ?

O2 N1 O1 123.58(14) . . ?

O2 N1 C4 118.10(13) . . ?

O1 N1 C4 118.31(14) . . ?

C2 C1 C6 118.19(12) . . ?

C2 C1 C7 117.70(12) . . ?

C6 C1 C7 124.04(13) . . ?

C3 C2 C1 121.52(13) . . ?

C3 C2 H2 119.2 . . ?

C1 C2 H2 119.2 . . ?

C4 C3 C2 118.25(13) . . ?

C4 C3 H3 120.9 . . ?

C2 C3 H3 120.9 . . ?

C5 C4 C3 122.28(13) . . ?

C5 C4 N1 118.76(13) . . ?

C3 C4 N1 118.94(13) . . ?

C4 C5 C6 119.01(13) . . ?

C4 C5 H5 120.5 . . ?

C6 C5 H5 120.5 . . ?

C5 C6 C1 120.74(13) . . ?

C5 C6 H6 119.6 . . ?

C1 C6 H6 119.6 . . ?

C8 C7 C1 130.48(13) . . ?

C8 C7 H7 114.8 . . ?

C1 C7 H7 114.8 . . ?

C7 C8 C9 117.78(13) . . ?

C7 C8 C12 125.42(13) . . ?

C9 C8 C12 116.80(12) . . ?

O3 C9 C10 121.31(13) . . ?

O3 C9 C8 120.85(13) . . ?

C10 C9 C8 117.80(12) . . ?

C13 C10 C9 117.76(12) . . ?

C13 C10 C11 125.32(13) . . ?

C9 C10 C11 116.86(12) . . ?

O4 C11 C10 110.45(12) . . ?

O4 C11 H11A 109.6 . . ?

C10 C11 H11A 109.6 . . ?

O4 C11 H11B 109.6 . . ?

C10 C11 H11B 109.6 . . ?

H11A C11 H11B 108.1 . . ?

O4 C12 C8 111.17(12) . . ?

O4 C12 H12A 109.4 . . ?

C8 C12 H12A 109.4 . . ?

O4 C12 H12B 109.4 . . ?

C8 C12 H12B 109.4 . . ?

H12A C12 H12B 108.0 . . ?  
C10 C13 C14 130.66(13) . . ?  
C10 C13 H13 114.7 . . ?  
C14 C13 H13 114.7 . . ?  
C19 C14 C15 117.87(13) . . ?  
C19 C14 C13 124.27(13) . . ?  
C15 C14 C13 117.77(13) . . ?  
C16 C15 C14 121.26(15) . . ?  
C16 C15 H15 119.4 . . ?  
C14 C15 H15 119.4 . . ?  
C17 C16 C15 119.93(16) . . ?  
C17 C16 H16 120.0 . . ?  
C15 C16 H16 120.0 . . ?  
C16 C17 C18 120.04(15) . . ?  
C16 C17 H17 120.0 . . ?  
C18 C17 H17 120.0 . . ?  
C17 C18 C19 120.47(16) . . ?  
C17 C18 H18 119.8 . . ?  
C19 C18 H18 119.8 . . ?  
C18 C19 C14 120.43(15) . . ?  
C18 C19 H19 119.8 . . ?  
C14 C19 H19 119.8 . . ?

loop\_

\_geom\_torsion\_atom\_site\_label\_1

\_geom\_torsion\_atom\_site\_label\_2

\_geom\_torsion\_atom\_site\_label\_3

\_geom\_torsion\_atom\_site\_label\_4

\_geom\_torsion

\_geom\_torsion\_site\_symmetry\_1

\_geom\_torsion\_site\_symmetry\_2

\_geom\_torsion\_site\_symmetry\_3

\_geom\_torsion\_site\_symmetry\_4

\_geom\_torsion\_publ\_flag

C6 C1 C2 C3 -1.3(2) . . . . ?

C7 C1 C2 C3 -178.32(13) . . . . ?

C1 C2 C3 C4 1.4(2) . . . . ?

C2 C3 C4 C5 -0.5(2) . . . . ?

C2 C3 C4 N1 178.06(13) . . . . ?

O2 N1 C4 C5 -167.28(16) . . . . ?

O1 N1 C4 C5 12.6(2) . . . . ?

O2 N1 C4 C3 14.1(2) . . . . ?

O1 N1 C4 C3 -165.99(15) . . . . ?

C3 C4 C5 C6 -0.5(2) . . . . ?

N1 C4 C5 C6 -179.01(14) . . . . ?

C4 C5 C6 C1 0.6(2) . . . . ?

C2 C1 C6 C5 0.3(2) . . . . ?

C7 C1 C6 C5 177.14(14) . . . . ?

C2 C1 C7 C8 -162.09(15) . . . . ?

C6 C1 C7 C8 21.0(2) . . . . ?

C1 C7 C8 C9 -176.74(14) . . . . ?  
C1 C7 C8 C12 4.1(3) . . . . ?  
C7 C8 C9 O3 -3.6(2) . . . . ?  
C12 C8 C9 O3 175.64(16) . . . . ?  
C7 C8 C9 C10 174.46(13) . . . . ?  
C12 C8 C9 C10 -6.3(2) . . . . ?  
O3 C9 C10 C13 -0.2(2) . . . . ?  
C8 C9 C10 C13 -178.32(13) . . . . ?  
O3 C9 C10 C11 -177.59(16) . . . . ?  
C8 C9 C10 C11 4.3(2) . . . . ?  
C12 O4 C11 C10 -66.43(16) . . . . ?  
C13 C10 C11 O4 -146.79(14) . . . . ?  
C9 C10 C11 O4 30.34(18) . . . . ?  
C11 O4 C12 C8 64.52(17) . . . . ?  
C7 C8 C12 O4 152.65(15) . . . . ?  
C9 C8 C12 O4 -26.6(2) . . . . ?  
C9 C10 C13 C14 176.86(14) . . . . ?  
C11 C10 C13 C14 -6.0(3) . . . . ?  
C10 C13 C14 C19 -24.8(2) . . . . ?  
C10 C13 C14 C15 158.80(15) . . . . ?  
C19 C14 C15 C16 0.8(2) . . . . ?  
C13 C14 C15 C16 177.39(15) . . . . ?  
C14 C15 C16 C17 -0.9(3) . . . . ?  
C15 C16 C17 C18 0.4(3) . . . . ?  
C16 C17 C18 C19 0.2(3) . . . . ?

C17 C18 C19 C14 -0.4(2) . . . . ?

C15 C14 C19 C18 -0.1(2) . . . . ?

C13 C14 C19 C18 -176.47(14) . . . . ?

loop\_

\_geom\_hbond\_atom\_site\_label\_D

\_geom\_hbond\_atom\_site\_label\_H

\_geom\_hbond\_atom\_site\_label\_A

\_geom\_hbond\_distance\_DH

\_geom\_hbond\_distance\_HA

\_geom\_hbond\_distance\_DA

\_geom\_hbond\_angle\_DHA

\_geom\_hbond\_site\_symmetry\_A

\_geom\_hbond\_publ\_flag

C5 H5 O3 0.93 2.56 3.1620(18) 123.0 1\_455 yes

C2 H2 O1 0.93 2.59 3.4102(19) 147.5 1\_655 yes

\_refine\_diff\_density\_max 0.189

\_refine\_diff\_density\_min -0.189

\_refine\_diff\_density\_rms 0.033

### **CIF of BDBC without HKL data**

data\_global

#=====

# PROCESSING SUMMARY (IUCr Office Use only)

\_publ\_contact\_author

;

Muhammad Nawaz Tahir

University of Sargodha

Department of Physics

Sargodha

Pakistan

;

\_publ\_contact\_author\_phone '0092 48 92 30 914'

\_publ\_contact\_author\_fax '0092 48 32 22 121'

\_publ\_contact\_author\_email 'dmntahir\_uos@yahoo.com'

\_publ\_requested\_journal ''

\_journal\_date\_recd\_electronic ?

\_journal\_date\_to\_coeditor ?

\_journal\_date\_from\_coeditor ?

\_journal\_date\_accepted ?

\_journal\_date\_printers\_first ?

\_journal\_date\_printers\_final ?

\_journal\_date\_proofs\_out ?

\_journal\_date\_proofs\_in ?



\_journal\_coeditor\_name ?

\_journal\_coeditor\_code ?

\_journal\_paper\_category ?

\_journal\_coeditor\_notes

;

;

\_journal\_techeditor\_code ?

\_iucr\_compatibility\_tag ?

\_journal\_techeditor\_notes

;

;

\_journal\_coden\_ASTM ?

\_journal\_name\_full ?

\_journal\_year ?

\_journal\_volume ?

\_journal\_issue ?

\_journal\_page\_first ?

\_journal\_page\_last ?

\_journal\_suppl\_publ\_number ?

\_journal\_suppl\_publ\_pages ?

#=====

loop\_

\_publ\_author\_name

\_publ\_author\_address

'Muhammad Ashfaq'

;

Department of Physics

University of Sargodha

Sargodha

Pakistan

;

'Muhammad Nawaz Tahir'

;

Department of Physics

University of Sargodha

Sargodha

Pakistan

;

'Aleksey Kuznetsov'

;

Departamento de Química, Campus Santiago Vitacura

Universidad Técnica Federico Santa María

Av. Santa María 6400 Vitacura

Chile

;

'Akbar Ali'

;

Department of Chemistry

University of Sargodha

Sargodha-40100

Pakistan

;

\_audit\_creation\_date ?

\_audit\_creation\_method ?

#=====

# TEXT

\_publ\_section\_title

;

(2E,5E)-2-benzylidene-5-(2,3-dimethoxybenzylidene)cyclopentanone

;

\_publ\_section\_abstract

;

;

\_publ\_section\_comment

;

;

\_publ\_section\_exptl\_refinement

;

;

\_publ\_section\_exptl\_prep

;

;

\_publ\_section\_related\_literature

;

;

\_publ\_section\_references

;

Bruker (2007). <i>SADABS</i>. Bruker AXS Inc., Madison, Wisconsin, USA.

Bruker (2007). <i>APEX2</i> and <i>SAINT</i>. Bruker AXS Inc.,  
Madison, Wisconsin, USA.

Farrugia, L. J. (2012). <i>J. Appl. Cryst.</i> **45**, 849--854.

Sheldrick, G. M. (2014). <i>Acta Cryst.</i> A**70**, C1437.

Sheldrick, G. M. (2015). <i>Acta Cryst.</i> C**71**, 3--8.

Spek, A. L. (2009). <i>Acta Cryst.</i> D**65**, 148--155.

;

\_publ\_section\_figure\_captions

;

;

\_publ\_section\_acknowledgements

;

;

data\_A1K10A10

\_audit\_creation\_method 'SHELXL-2019/2'

\_shelx\_SHELXL\_version\_number '2019/2'

\_chemical\_name\_common ?

\_chemical\_absolute\_configuration '.'

\_chemical\_name\_systematic

;

(2E,5E)-2-benzylidene-5-(2,3-dimethoxybenzylidene)cyclopentanone

;

\_chemical\_formula\_moiety 'C21 H20 O3'

\_chemical\_formula\_sum 'C21 H20 O3'

\_chemical\_formula\_iupac 'C21 H20 O3'

\_chemical\_formula\_weight 320.37

loop\_

\_atom\_type\_symbol

\_atom\_type\_description

\_atom\_type\_scatter\_dispersion\_real

\_atom\_type\_scatter\_dispersion\_imag

\_atom\_type\_scatter\_source

'C' 'C' 0.0033 0.0016

'International Tables Vol C Tables 4.2.6.8 and 6.1.1.4'

'H' 'H' 0.0000 0.0000

'International Tables Vol C Tables 4.2.6.8 and 6.1.1.4'

'O' 'O' 0.0106 0.0060

'International Tables Vol C Tables 4.2.6.8 and 6.1.1.4'

\_space\_group\_crystal\_system orthorhombic

\_space\_group\_IT\_number 61

\_space\_group\_name\_H-M\_alt 'P b c a'

\_space\_group\_name\_Hall '-P 2ac 2ab'

\_shelx\_space\_group\_comment

;

The symmetry employed for this shelxl refinement is uniquely defined by the following loop, which should always be used as a source of symmetry information in preference to the above space-group names.

They are only intended as comments.

;

loop\_

\_space\_group\_symop\_operation\_xyz

'x, y, z'

'x+1/2, -y+1/2, -z'

'-x, y+1/2, -z+1/2'

'-x+1/2, -y, z+1/2'

'-x, -y, -z'

'-x-1/2, y-1/2, z'

'x, -y-1/2, z-1/2'

'x-1/2, y, -z-1/2'

\_cell\_length\_a            16.154(2)

\_cell\_length\_b            6.9813(10)

\_cell\_length\_c            28.997(4)

\_cell\_angle\_alpha         90

\_cell\_angle\_beta          90

\_cell\_angle\_gamma         90

\_cell\_volume 3270.2(8)  
\_cell\_formula\_units\_Z 8  
\_cell\_measurement\_reflns\_used 2623  
\_cell\_measurement\_theta\_min 1.404  
\_cell\_measurement\_theta\_max 25.347  
\_cell\_measurement\_temperature 150(2)  
\_exptl\_crystal\_description needle  
\_exptl\_crystal\_colour 'white'  
\_exptl\_crystal\_size\_max 0.361  
\_exptl\_crystal\_size\_mid 0.345  
\_exptl\_crystal\_size\_min 0.194  
\_exptl\_crystal\_density\_diffn 1.301  
\_exptl\_crystal\_density\_meas ?  
\_exptl\_crystal\_density\_method 'not measured'  
\_exptl\_crystal\_F\_000 1360  
\_exptl\_absorpt\_coefficient\_mu 0.086  
\_exptl\_absorpt\_correction\_type multi-scan  
\_exptl\_absorpt\_process\_details '(SADABS; Bruker, 2007)'  
\_exptl\_absorpt\_correction\_T\_min 0.983  
\_exptl\_absorpt\_correction\_T\_max 0.988  
\_exptl\_special\_details  
;  
;



\_diffraction\_ambient\_temperature 150(2)  
\_diffraction\_radiation\_type MoK\alpha  
\_diffraction\_radiation\_wavelength 0.71073  
\_diffraction\_radiation\_source 'fine-focus sealed tube'  
\_diffraction\_radiation\_monochromator graphite  
\_diffraction\_measurement\_device\_type 'Bruker Kappa APEXII CCD'  
\_diffraction\_measurement\_method \w  
\_diffraction\_detector\_area\_resol\_mean 8.301  
\_diffraction\_reflns\_number 57033  
\_diffraction\_reflns\_av\_unetl/netl 0.0108  
\_diffraction\_reflns\_av\_R\_equivalents 0.0258  
\_diffraction\_reflns\_limit\_h\_min -19  
\_diffraction\_reflns\_limit\_h\_max 19  
\_diffraction\_reflns\_limit\_k\_min -8  
\_diffraction\_reflns\_limit\_k\_max 5  
\_diffraction\_reflns\_limit\_l\_min -34  
\_diffraction\_reflns\_limit\_l\_max 34  
\_diffraction\_reflns\_theta\_min 1.404  
\_diffraction\_reflns\_theta\_max 25.347  
\_diffraction\_reflns\_theta\_full 25.242  
\_diffraction\_measured\_fraction\_theta\_max 1.000  
\_diffraction\_measured\_fraction\_theta\_full 1.000  
\_diffraction\_reflns\_Laue\_measured\_fraction\_max 1.000  
\_diffraction\_reflns\_Laue\_measured\_fraction\_full 1.000  
\_diffraction\_reflns\_point\_group\_measured\_fraction\_max 1.000

\_diffn\_reflns\_point\_group\_measured\_fraction\_full 1.000

\_diffn\_standards\_number 0

\_diffn\_standards\_interval\_count ?

\_diffn\_standards\_interval\_time ?

\_diffn\_standards\_decay\_% ?

\_refine\_special\_details

;

Refinement of  $\langle F \rangle^2$  against ALL reflections. The weighted  $\langle R \rangle$ -factor  $\langle wR \rangle$  and goodness of fit  $\langle S \rangle$  are based on  $\langle F \rangle^2$ , conventional  $\langle R \rangle$ -factors  $\langle R \rangle$  are based on  $\langle F \rangle$ , with  $\langle F \rangle$  set to zero for negative  $\langle F \rangle^2$ . The threshold expression of  $\langle F \rangle^2 >$

$\sqrt{\langle F \rangle^2}$  is used only for calculating  $\langle R \rangle$ -factors(gt) etc.

and is not relevant to the choice of reflections for refinement.

$\langle R \rangle$ -factors based on  $\langle F \rangle^2$  are statistically about twice as large as those based on  $\langle F \rangle$ , and  $\langle R \rangle$ -factors based on ALL data will be even larger.

;

\_reflns\_number\_total 2992

\_reflns\_number\_gt 2623

\_reflns\_threshold\_expression  $l > 2 \sqrt{l}$

\_refine\_ls\_structure\_factor\_coef Fsqd

\_refine\_ls\_matrix\_type full

\_refine\_ls\_R\_factor\_all 0.0623

\_refine\_ls\_R\_factor\_gt 0.0547

\_refine\_ls\_wR\_factor\_ref 0.1161  
\_refine\_ls\_wR\_factor\_gt 0.1123  
\_refine\_ls\_goodness\_of\_fit\_ref 1.159  
\_refine\_ls\_restrained\_S\_all 1.159  
\_refine\_ls\_number\_reflns 2992  
\_refine\_ls\_number\_parameters 219  
\_refine\_ls\_number\_restraints 0  
\_refine\_ls\_extinction\_method none  
\_refine\_ls\_extinction\_coef .  
\_refine\_ls\_hydrogen\_treatment constr  
\_refine\_ls\_weighting\_scheme calc  
\_refine\_ls\_weighting\_details  
'w=1/[\s^2^(Fo^2^)+(0.0146P)^2^+4.2071P] where P=(Fo^2^+2Fc^2^)/3'  
\_atom\_sites\_solution\_hydrogens geom  
\_atom\_sites\_solution\_primary direct  
\_atom\_sites\_solution\_secondary difmap  
\_refine\_ls\_shift/su\_max 0.000  
\_refine\_ls\_shift/su\_mean 0.000  
\_computing\_data\_collection 'APEX2 (Bruker, 2007)'  
\_computing\_cell\_refinement 'SAINT (Bruker, 2007)'  
\_computing\_data\_reduction 'SAINT (Bruker, 2007)'  
\_computing\_structure\_solution 'SHELXT-2015 (Sheldrick, 2015)'  
\_computing\_structure\_refinement 'SHELXL-2019/2 (Sheldrick, 2019)'  
\_computing\_molecular\_graphics  
'ORTEP-3 for Windows (Farrugia, 2012) and PLATON (Spek, 2009)'

\_computing\_publication\_material

;

WinGX (Farrugia, 2012) and PLATON (Spek, 2009)

;

loop\_

\_atom\_site\_label

\_atom\_site\_type\_symbol

\_atom\_site\_fract\_x

\_atom\_site\_fract\_y

\_atom\_site\_fract\_z

\_atom\_site\_U\_iso\_or\_equiv

\_atom\_site\_adp\_type

\_atom\_site\_occupancy

\_atom\_site\_site\_symmetry\_order

\_atom\_site\_calc\_flag

\_atom\_site\_refinement\_flags\_posn

\_atom\_site\_refinement\_flags\_adp

\_atom\_site\_refinement\_flags\_occupancy

\_atom\_site\_disorder\_assembly

\_atom\_site\_disorder\_group

O1 O 0.10409(10) 0.1072(2) 0.16956(6) 0.0408(4) Uani 1 1 d . . . . .

O2 O 0.14532(11) 0.4216(3) 0.21617(6) 0.0489(5) Uani 1 1 d . . . . .

O3 O 0.02606(10) -0.2416(3) 0.03233(6) 0.0428(4) Uani 1 1 d . . . . .

C1 C 0.12653(14) 0.2649(3) 0.09683(9) 0.0361(5) Uani 1 1 d . . . . .

C2 C 0.12498(14) 0.2710(3) 0.14481(9) 0.0356(5) Uani 1 1 d . . . . .  
C3 C 0.14809(14) 0.4352(4) 0.16897(9) 0.0388(6) Uani 1 1 d . . . . .  
C4 C 0.17201(14) 0.5974(4) 0.14479(10) 0.0431(6) Uani 1 1 d . . . . .  
H4 H 0.1873 0.7104 0.1609 0.052 Uiso 1 1 calc R U . . .  
C5 C 0.17355(14) 0.5940(3) 0.09711(10) 0.0429(6) Uani 1 1 d . . . . .  
H5 H 0.1902 0.7052 0.0807 0.051 Uiso 1 1 calc R U . . .  
C6 C 0.15136(14) 0.4322(3) 0.07323(10) 0.0415(6) Uani 1 1 d . . . . .  
H6 H 0.1527 0.4328 0.0405 0.050 Uiso 1 1 calc R U . . .  
C7 C 0.02382(16) 0.1177(4) 0.19020(9) 0.0463(6) Uani 1 1 d . . . . .  
H7A H 0.0171 0.0122 0.2122 0.069 Uiso 1 1 calc R U . . .  
H7B H -0.0186 0.1080 0.1662 0.069 Uiso 1 1 calc R U . . .  
H7C H 0.0179 0.2401 0.2064 0.069 Uiso 1 1 calc R U . . .  
C8 C 0.16035(18) 0.5934(4) 0.24129(10) 0.0568(8) Uani 1 1 d . . . . .  
H8A H 0.1538 0.5687 0.2744 0.085 Uiso 1 1 calc R U . . .  
H8B H 0.1208 0.6919 0.2316 0.085 Uiso 1 1 calc R U . . .  
H8C H 0.2168 0.6379 0.2352 0.085 Uiso 1 1 calc R U . . .  
C9 C 0.10013(14) 0.0913(3) 0.07268(9) 0.0370(6) Uani 1 1 d . . . . .  
H9 H 0.0696 0.0026 0.0908 0.044 Uiso 1 1 calc R U . . .  
C10 C 0.11260(14) 0.0394(3) 0.02889(8) 0.0353(5) Uani 1 1 d . . . . .  
C11 C 0.07701(13) -0.1422(3) 0.01166(8) 0.0356(6) Uani 1 1 d . . . . .  
C12 C 0.11160(13) -0.1831(3) -0.03459(8) 0.0349(5) Uani 1 1 d . . . . .  
C13 C 0.16969(14) -0.0223(3) -0.04778(8) 0.0381(6) Uani 1 1 d . . . . .  
H13A H 0.1538 0.0325 -0.0780 0.046 Uiso 1 1 calc R U . . .  
H13B H 0.2273 -0.0699 -0.0498 0.046 Uiso 1 1 calc R U . . .  
C14 C 0.16204(15) 0.1303(3) -0.00939(8) 0.0398(6) Uani 1 1 d . . . . .

H14A H 0.2175 0.1682 0.0019 0.048 Uiso 1 1 calc R U . . .  
H14B H 0.1334 0.2457 -0.0212 0.048 Uiso 1 1 calc R U . . .  
C15 C 0.08736(14) -0.3402(3) -0.05773(8) 0.0368(6) Uani 1 1 d . . . . .  
H15 H 0.0499 -0.4203 -0.0414 0.044 Uiso 1 1 calc R U . . .  
C16 C 0.10911(14) -0.4078(3) -0.10365(8) 0.0344(5) Uani 1 1 d . . . . .  
C17 C 0.06035(15) -0.5514(3) -0.12342(9) 0.0408(6) Uani 1 1 d . . . . .  
H17 H 0.0161 -0.6052 -0.1062 0.049 Uiso 1 1 calc R U . . .  
C18 C 0.07545(16) -0.6163(4) -0.16752(10) 0.0467(7) Uani 1 1 d . . . . .  
H18 H 0.0404 -0.7112 -0.1806 0.056 Uiso 1 1 calc R U . . .  
C19 C 0.14073(16) -0.5452(4) -0.19294(10) 0.0450(6) Uani 1 1 d . . . . .  
H19 H 0.1509 -0.5906 -0.2233 0.054 Uiso 1 1 calc R U . . .  
C20 C 0.19114(15) -0.4067(4) -0.17346(9) 0.0425(6) Uani 1 1 d . . . . .  
H20 H 0.2369 -0.3586 -0.1905 0.051 Uiso 1 1 calc R U . . .  
C21 C 0.17610(14) -0.3380(3) -0.12996(9) 0.0380(6) Uani 1 1 d . . . . .  
H21 H 0.2112 -0.2422 -0.1174 0.046 Uiso 1 1 calc R U . . .

loop\_

\_atom\_site\_aniso\_label  
\_atom\_site\_aniso\_U\_11  
\_atom\_site\_aniso\_U\_22  
\_atom\_site\_aniso\_U\_33  
\_atom\_site\_aniso\_U\_23  
\_atom\_site\_aniso\_U\_13  
\_atom\_site\_aniso\_U\_12

O1 0.0441(10) 0.0286(8) 0.0499(10) 0.0120(8) 0.0011(8) 0.0024(7)

O2 0.0506(11) 0.0414(10) 0.0547(11) 0.0003(9) -0.0110(9) -0.0037(9)  
O3 0.0387(9) 0.0449(10) 0.0448(10) 0.0129(8) 0.0016(8) -0.0147(8)  
C1 0.0275(11) 0.0285(12) 0.0524(15) 0.0086(11) 0.0000(11) -0.0001(10)  
C2 0.0263(11) 0.0276(11) 0.0531(15) 0.0116(11) -0.0018(11) 0.0018(10)  
C3 0.0271(12) 0.0376(13) 0.0517(15) 0.0058(12) -0.0067(11) 0.0014(10)  
C4 0.0283(12) 0.0314(13) 0.0696(19) 0.0029(13) -0.0059(12) -0.0051(10)  
C5 0.0309(13) 0.0316(13) 0.0661(18) 0.0145(12) 0.0000(12) -0.0054(10)  
C6 0.0339(13) 0.0339(13) 0.0568(16) 0.0141(12) 0.0016(12) -0.0019(11)  
C7 0.0460(15) 0.0371(13) 0.0558(16) 0.0128(12) 0.0004(13) -0.0058(12)  
C8 0.0531(17) 0.0534(17) 0.0640(19) -0.0073(15) -0.0195(15) -0.0058(14)  
C9 0.0301(12) 0.0305(12) 0.0503(15) 0.0146(11) -0.0003(11) -0.0010(10)  
C10 0.0290(12) 0.0334(12) 0.0435(14) 0.0154(11) -0.0021(10) -0.0020(10)  
C11 0.0259(11) 0.0374(13) 0.0436(14) 0.0173(11) -0.0071(10) -0.0034(10)  
C12 0.0265(11) 0.0370(13) 0.0413(13) 0.0180(11) -0.0047(10) -0.0038(10)  
C13 0.0330(12) 0.0387(13) 0.0426(14) 0.0181(11) -0.0029(11) -0.0054(11)  
C14 0.0355(13) 0.0358(13) 0.0482(15) 0.0152(11) -0.0017(11) -0.0062(11)  
C15 0.0283(11) 0.0384(13) 0.0438(14) 0.0187(11) -0.0026(10) -0.0043(10)  
C16 0.0292(11) 0.0328(12) 0.0413(13) 0.0155(10) -0.0036(10) -0.0001(10)  
C17 0.0335(12) 0.0350(13) 0.0539(16) 0.0111(12) 0.0028(12) -0.0053(11)  
C18 0.0406(14) 0.0383(14) 0.0611(18) 0.0006(13) 0.0026(13) -0.0021(11)  
C19 0.0423(14) 0.0345(13) 0.0583(17) 0.0019(12) 0.0058(13) 0.0078(11)  
C20 0.0354(13) 0.0370(13) 0.0551(16) 0.0106(12) 0.0078(12) 0.0036(11)  
C21 0.0315(12) 0.0327(12) 0.0497(15) 0.0111(11) -0.0029(11) -0.0020(10)

\_geom\_special\_details

;

All esds (except the esd in the dihedral angle between two l.s. planes) are estimated using the full covariance matrix. The cell esds are taken into account individually in the estimation of esds in distances, angles and torsion angles; correlations between esds in cell parameters are only used when they are defined by crystal symmetry. An approximate (isotropic) treatment of cell esds is used for estimating esds involving l.s. planes.

;

loop\_

\_geom\_bond\_atom\_site\_label\_1

\_geom\_bond\_atom\_site\_label\_2

\_geom\_bond\_distance

\_geom\_bond\_site\_symmetry\_2

\_geom\_bond\_publ\_flag

O1 C2 1.391(3) . ?

O1 C7 1.430(3) . ?

O2 C3 1.373(3) . ?

O2 C8 1.424(3) . ?

O3 C11 1.232(3) . ?

C1 C2 1.392(3) . ?

C1 C6 1.412(3) . ?

C1 C9 1.463(3) . ?

C2 C3 1.395(3) . ?

C3 C4 1.386(3) . ?



C4 C5 1.383(4) . ?

C4 H4 0.9500 . ?

C5 C6 1.373(4) . ?

C5 H5 0.9500 . ?

C6 H6 0.9500 . ?

C7 H7A 0.9800 . ?

C7 H7B 0.9800 . ?

C7 H7C 0.9800 . ?

C8 H8A 0.9800 . ?

C8 H8B 0.9800 . ?

C8 H8C 0.9800 . ?

C9 C10 1.336(3) . ?

C9 H9 0.9500 . ?

C10 C11 1.479(3) . ?

C10 C14 1.508(3) . ?

C11 C12 1.481(3) . ?

C12 C15 1.344(3) . ?

C12 C13 1.512(3) . ?

C13 C14 1.546(4) . ?

C13 H13A 0.9900 . ?

C13 H13B 0.9900 . ?

C14 H14A 0.9900 . ?

C14 H14B 0.9900 . ?

C15 C16 1.456(3) . ?

C15 H15 0.9500 . ?

C16 C17 1.398(3) . ?

C16 C21 1.411(3) . ?

C17 C18 1.378(4) . ?

C17 H17 0.9500 . ?

C18 C19 1.379(4) . ?

C18 H18 0.9500 . ?

C19 C20 1.385(4) . ?

C19 H19 0.9500 . ?

C20 C21 1.371(4) . ?

C20 H20 0.9500 . ?

C21 H21 0.9500 . ?

loop\_

\_geom\_angle\_atom\_site\_label\_1

\_geom\_angle\_atom\_site\_label\_2

\_geom\_angle\_atom\_site\_label\_3

\_geom\_angle

\_geom\_angle\_site\_symmetry\_1

\_geom\_angle\_site\_symmetry\_3

\_geom\_angle\_publ\_flag

C2 O1 C7 113.19(18) . . ?

C3 O2 C8 116.5(2) . . ?

C2 C1 C6 117.7(2) . . ?

C2 C1 C9 119.9(2) . . ?

C6 C1 C9 122.4(2) . . ?

O1 C2 C1 119.7(2) . . ?  
O1 C2 C3 118.8(2) . . ?  
C1 C2 C3 121.5(2) . . ?  
O2 C3 C4 124.8(2) . . ?  
O2 C3 C2 115.8(2) . . ?  
C4 C3 C2 119.5(2) . . ?  
C5 C4 C3 119.8(2) . . ?  
C5 C4 H4 120.1 . . ?  
C3 C4 H4 120.1 . . ?  
C6 C5 C4 120.9(2) . . ?  
C6 C5 H5 119.6 . . ?  
C4 C5 H5 119.6 . . ?  
C5 C6 C1 120.7(2) . . ?  
C5 C6 H6 119.6 . . ?  
C1 C6 H6 119.6 . . ?  
O1 C7 H7A 109.5 . . ?  
O1 C7 H7B 109.5 . . ?  
H7A C7 H7B 109.5 . . ?  
O1 C7 H7C 109.5 . . ?  
H7A C7 H7C 109.5 . . ?  
H7B C7 H7C 109.5 . . ?  
O2 C8 H8A 109.5 . . ?  
O2 C8 H8B 109.5 . . ?  
H8A C8 H8B 109.5 . . ?  
O2 C8 H8C 109.5 . . ?

H8A C8 H8C 109.5 . . ?

H8B C8 H8C 109.5 . . ?

C10 C9 C1 129.5(2) . . ?

C10 C9 H9 115.3 . . ?

C1 C9 H9 115.3 . . ?

C9 C10 C11 119.7(2) . . ?

C9 C10 C14 131.7(2) . . ?

C11 C10 C14 108.5(2) . . ?

O3 C11 C10 125.3(2) . . ?

O3 C11 C12 125.7(2) . . ?

C10 C11 C12 108.95(19) . . ?

C15 C12 C11 120.0(2) . . ?

C15 C12 C13 131.3(2) . . ?

C11 C12 C13 108.7(2) . . ?

C12 C13 C14 106.26(19) . . ?

C12 C13 H13A 110.5 . . ?

C14 C13 H13A 110.5 . . ?

C12 C13 H13B 110.5 . . ?

C14 C13 H13B 110.5 . . ?

H13A C13 H13B 108.7 . . ?

C10 C14 C13 106.41(19) . . ?

C10 C14 H14A 110.4 . . ?

C13 C14 H14A 110.4 . . ?

C10 C14 H14B 110.4 . . ?

C13 C14 H14B 110.4 . . ?

H14A C14 H14B 108.6 . . ?

C12 C15 C16 130.6(2) . . ?

C12 C15 H15 114.7 . . ?

C16 C15 H15 114.7 . . ?

C17 C16 C21 117.3(2) . . ?

C17 C16 C15 118.1(2) . . ?

C21 C16 C15 124.6(2) . . ?

C18 C17 C16 121.1(2) . . ?

C18 C17 H17 119.5 . . ?

C16 C17 H17 119.5 . . ?

C17 C18 C19 120.9(3) . . ?

C17 C18 H18 119.6 . . ?

C19 C18 H18 119.6 . . ?

C18 C19 C20 118.9(3) . . ?

C18 C19 H19 120.6 . . ?

C20 C19 H19 120.6 . . ?

C21 C20 C19 121.0(2) . . ?

C21 C20 H20 119.5 . . ?

C19 C20 H20 119.5 . . ?

C20 C21 C16 120.8(2) . . ?

C20 C21 H21 119.6 . . ?

C16 C21 H21 119.6 . . ?

loop\_

\_geom\_torsion\_atom\_site\_label\_1

\_geom\_torsion\_atom\_site\_label\_2

\_geom\_torsion\_atom\_site\_label\_3

\_geom\_torsion\_atom\_site\_label\_4

\_geom\_torsion

\_geom\_torsion\_site\_symmetry\_1

\_geom\_torsion\_site\_symmetry\_2

\_geom\_torsion\_site\_symmetry\_3

\_geom\_torsion\_site\_symmetry\_4

\_geom\_torsion\_publ\_flag

C7 O1 C2 C1 -107.6(2) . . . . ?

C7 O1 C2 C3 75.7(3) . . . . ?

C6 C1 C2 O1 -177.5(2) . . . . ?

C9 C1 C2 O1 4.7(3) . . . . ?

C6 C1 C2 C3 -0.8(3) . . . . ?

C9 C1 C2 C3 -178.7(2) . . . . ?

C8 O2 C3 C4 6.5(3) . . . . ?

C8 O2 C3 C2 -173.7(2) . . . . ?

O1 C2 C3 O2 -2.2(3) . . . . ?

C1 C2 C3 O2 -178.8(2) . . . . ?

O1 C2 C3 C4 177.6(2) . . . . ?

C1 C2 C3 C4 1.0(4) . . . . ?

O2 C3 C4 C5 179.1(2) . . . . ?

C2 C3 C4 C5 -0.7(4) . . . . ?

C3 C4 C5 C6 0.3(4) . . . . ?

C4 C5 C6 C1 -0.1(4) . . . . ?

C2 C1 C6 C5 0.4(3) . . . . ?  
C9 C1 C6 C5 178.2(2) . . . . ?  
C2 C1 C9 C10 -164.3(2) . . . . ?  
C6 C1 C9 C10 18.0(4) . . . . ?  
C1 C9 C10 C11 -177.9(2) . . . . ?  
C1 C9 C10 C14 5.1(4) . . . . ?  
C9 C10 C11 O3 10.7(3) . . . . ?  
C14 C10 C11 O3 -171.6(2) . . . . ?  
C9 C10 C11 C12 -170.1(2) . . . . ?  
C14 C10 C11 C12 7.6(2) . . . . ?  
O3 C11 C12 C15 0.2(3) . . . . ?  
C10 C11 C12 C15 -179.0(2) . . . . ?  
O3 C11 C12 C13 178.2(2) . . . . ?  
C10 C11 C12 C13 -1.0(2) . . . . ?  
C15 C12 C13 C14 171.9(2) . . . . ?  
C11 C12 C13 C14 -5.8(2) . . . . ?  
C9 C10 C14 C13 166.3(2) . . . . ?  
C11 C10 C14 C13 -11.0(2) . . . . ?  
C12 C13 C14 C10 10.2(2) . . . . ?  
C11 C12 C15 C16 177.3(2) . . . . ?  
C13 C12 C15 C16 -0.2(4) . . . . ?  
C12 C15 C16 C17 -165.2(2) . . . . ?  
C12 C15 C16 C21 14.6(4) . . . . ?  
C21 C16 C17 C18 -2.5(3) . . . . ?  
C15 C16 C17 C18 177.3(2) . . . . ?

C16 C17 C18 C19 2.0(4) . . . . ?

C17 C18 C19 C20 -0.1(4) . . . . ?

C18 C19 C20 C21 -1.1(4) . . . . ?

C19 C20 C21 C16 0.5(4) . . . . ?

C17 C16 C21 C20 1.3(3) . . . . ?

C15 C16 C21 C20 -178.5(2) . . . . ?

loop\_

\_geom\_hbond\_atom\_site\_label\_D

\_geom\_hbond\_atom\_site\_label\_H

\_geom\_hbond\_atom\_site\_label\_A

\_geom\_hbond\_distance\_DH

\_geom\_hbond\_distance\_HA

\_geom\_hbond\_distance\_DA

\_geom\_hbond\_angle\_DHA

\_geom\_hbond\_site\_symmetry\_A

C14 H14B O3 0.99 2.60 3.206(3) 119.9 5

C17 H17 O3 0.95 2.49 3.319(3) 146.0 5\_545

\_refine\_diff\_density\_max 0.215

\_refine\_diff\_density\_min -0.174

\_refine\_diff\_density\_rms 0.042
